# Supplementary material
Source: publisher figshare collection journal article supplement (https://acs.figshare.com/ndownloader/files/4545196)

# Supporting Information

for

## Cycloartane Triterpenoids from *Kleinhovia hospita*

Li-She Gan,<sup>†</sup> Gang Ren,<sup>†</sup> Jian-Xia Mo,<sup>†</sup> Xiang-Yi Zhang,<sup>†</sup>

Wei Yao,<sup>‡</sup> and Chang-Xin Zhou<sup>\*,†</sup>

<sup>†</sup> College of Pharmaceutical Sciences, Zhejiang University, 388 Yuhangtang Rd., Hangzhou 310058, P. R. China.

<sup>‡</sup> Zhejiang Chem-Tech Group Co., Ltd., Hangzhou 310023, People's Republic of China.

\* To whom correspondence should be addressed. Tel./Fax.: 86-571-88208457; Email: zhoucx10@zju.edu.cn

- S1. <sup>1</sup>H NMR spectrum of compound **1** at 400 MHz in CDCl<sub>3</sub>.
- S2. <sup>13</sup>C NMR spectrum of compound **1** at 100 MHz in CDCl<sub>3</sub>.
- S3. <sup>13</sup>C NMR spectrum (high field expanded) of compound **1** at 100 MHz in CDCl<sub>3</sub>.
- S4. DEPT (135) spectrum of compound **1** at 100 MHz in CDCl<sub>3</sub>.
- S5. ESI MS (positive mode) spectrum of **1**.
- S6. HSQC spectrum of compound **1** at 400 MHz in CDCl<sub>3</sub>.
- S7. <sup>1</sup>H-<sup>1</sup>H COSY spectrum of compound **1** at 400 MHz in CDCl<sub>3</sub>.
- S8. HMBC spectrum of compound **1** at 400 MHz in CDCl<sub>3</sub>.
- S9. NOESY spectrum of compound **1** at 400 MHz in CDCl<sub>3</sub>.
- S10. IR (KBr disc) spectrum of compound **1**.
- S11. <sup>1</sup>H NMR spectrum of compound **2** and **3** in a mixture at 400 MHz in CDCl<sub>3</sub>.
- S12. <sup>1</sup>H NMR spectrum (high field, expanded) of compound **2** and **3** in a mixture at 400 MHz in CDCl<sub>3</sub>.
- S13. <sup>13</sup>C NMR spectrum of compound **2** and **3** in a mixture at 100 MHz in CDCl<sub>3</sub>.
- S14. <sup>13</sup>C NMR spectrum (high field, expanded) of compound **2** and **3** in a mixture at 100 MHz in CDCl<sub>3</sub>.
- S15. DEPT (135) spectrum of compound **2** and **3** in a mixture at 100 MHz in CDCl<sub>3</sub>.

- S16. HSQC (undecoupling) spectrum of compound **2** and **3** in a mixture at 400 MHz in CDCl<sub>3</sub>.
- S17. HMBC spectrum of compound **2** and **3** in a mixture at 400 MHz in CDCl<sub>3</sub>.
- S18. NOESY spectrum of compound **2** and **3** in a mixture at 400 MHz in CDCl<sub>3</sub>.
- S19. IR (KBr disc) spectrum of compound **2** and **3** in a mixture.
- S20. <sup>1</sup>H NMR spectrum of compound **4** at 400 MHz in CDCl<sub>3</sub>.
- S21. <sup>13</sup>C NMR spectrum of compound **4** at 100 MHz in CDCl<sub>3</sub>.
- S22. <sup>13</sup>C NMR spectrum (high field, expanded) of compound **4** at 100 MHz in CDCl<sub>3</sub>.
- S23. DEPT (135) spectrum of compound **4** at 100 MHz in CDCl<sub>3</sub>.
- S24. HSQC (undecoupling) spectrum of compound **4** at 400 MHz in CDCl<sub>3</sub>.
- S25. HMBC spectrum of compound **4** at 400 MHz in CDCl<sub>3</sub>.
- S26. NOESY spectrum of compound **4** at 400 MHz in CDCl<sub>3</sub>.
- S27. IR (KBr disc) spectrum of compound **4**.
- S28. ESI MS spectra of compound **4** and a mixture of compounds **2** and **3**.

S1.  $^1\text{H}$  NMR spectrum of compound **1** at 400 MHz in  $\text{CDCl}_3$ .

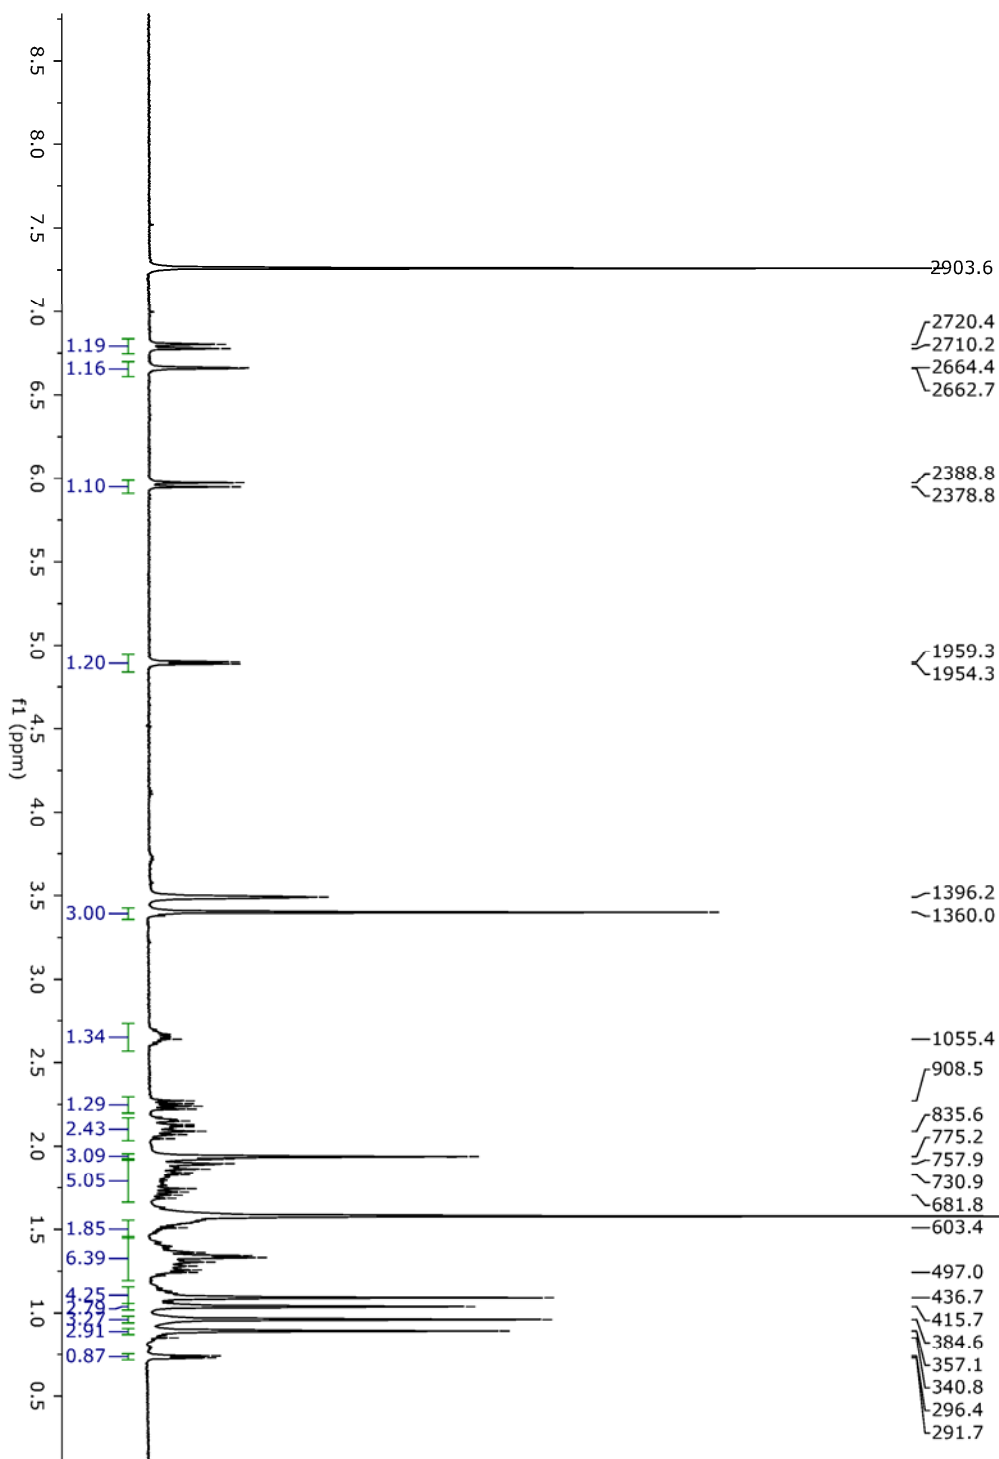

S2.  $^{13}\text{C}$  NMR spectrum of compound **1** at 100 MHz in  $\text{CDCl}_3$ .

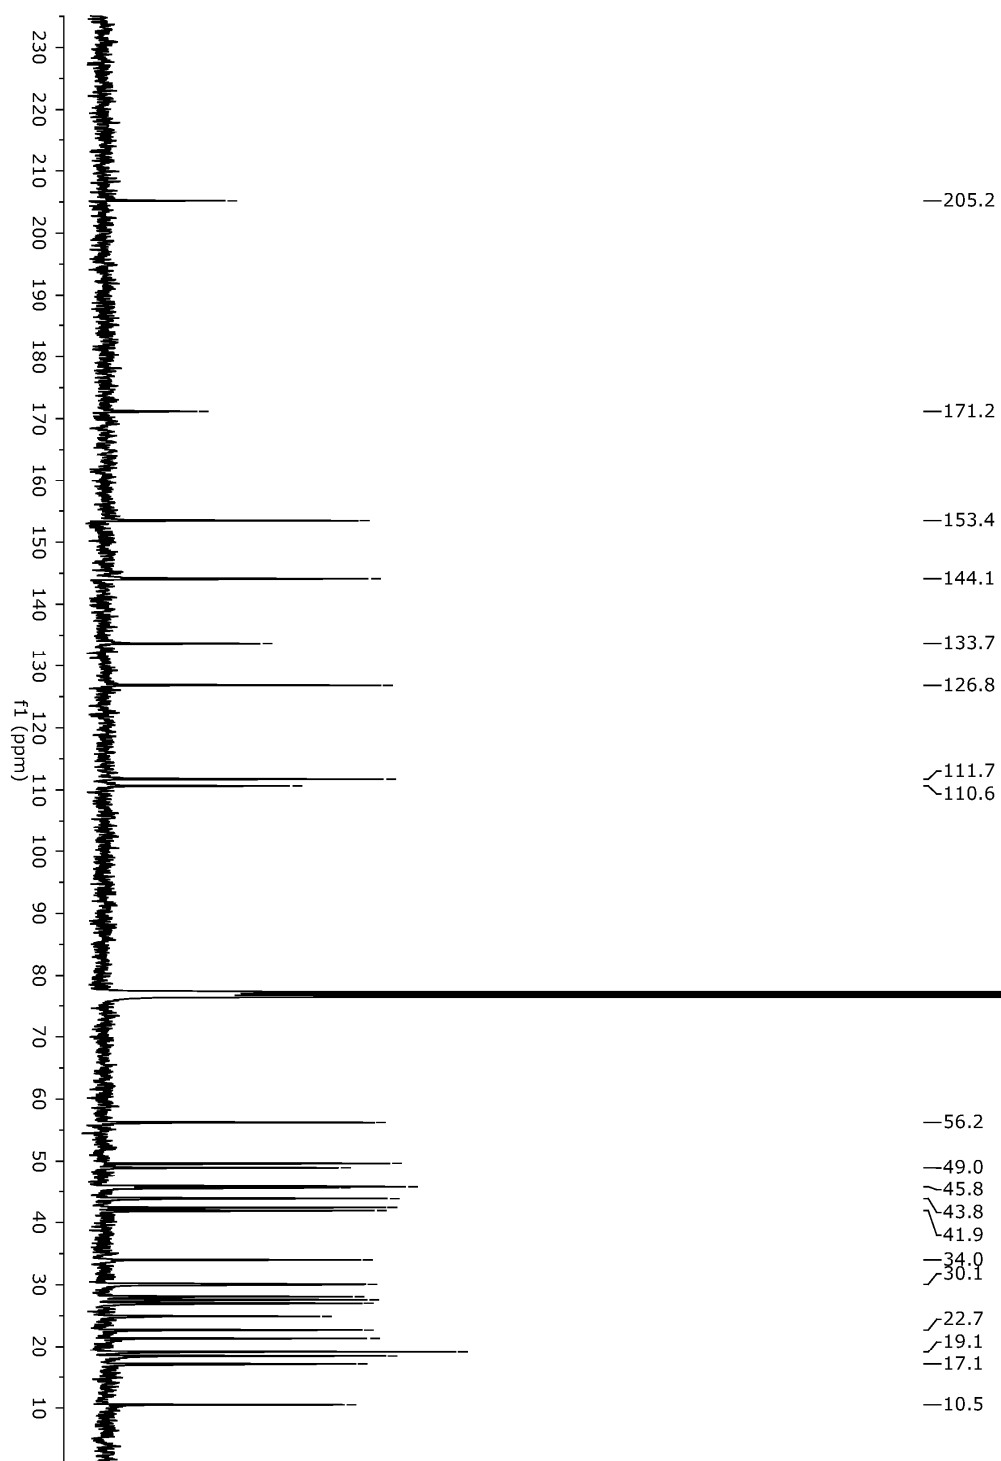

S3.  $^{13}\text{C}$  NMR spectrum (high field expanded) of compound **1** at 100 MHz in  $\text{CDCl}_3$ .

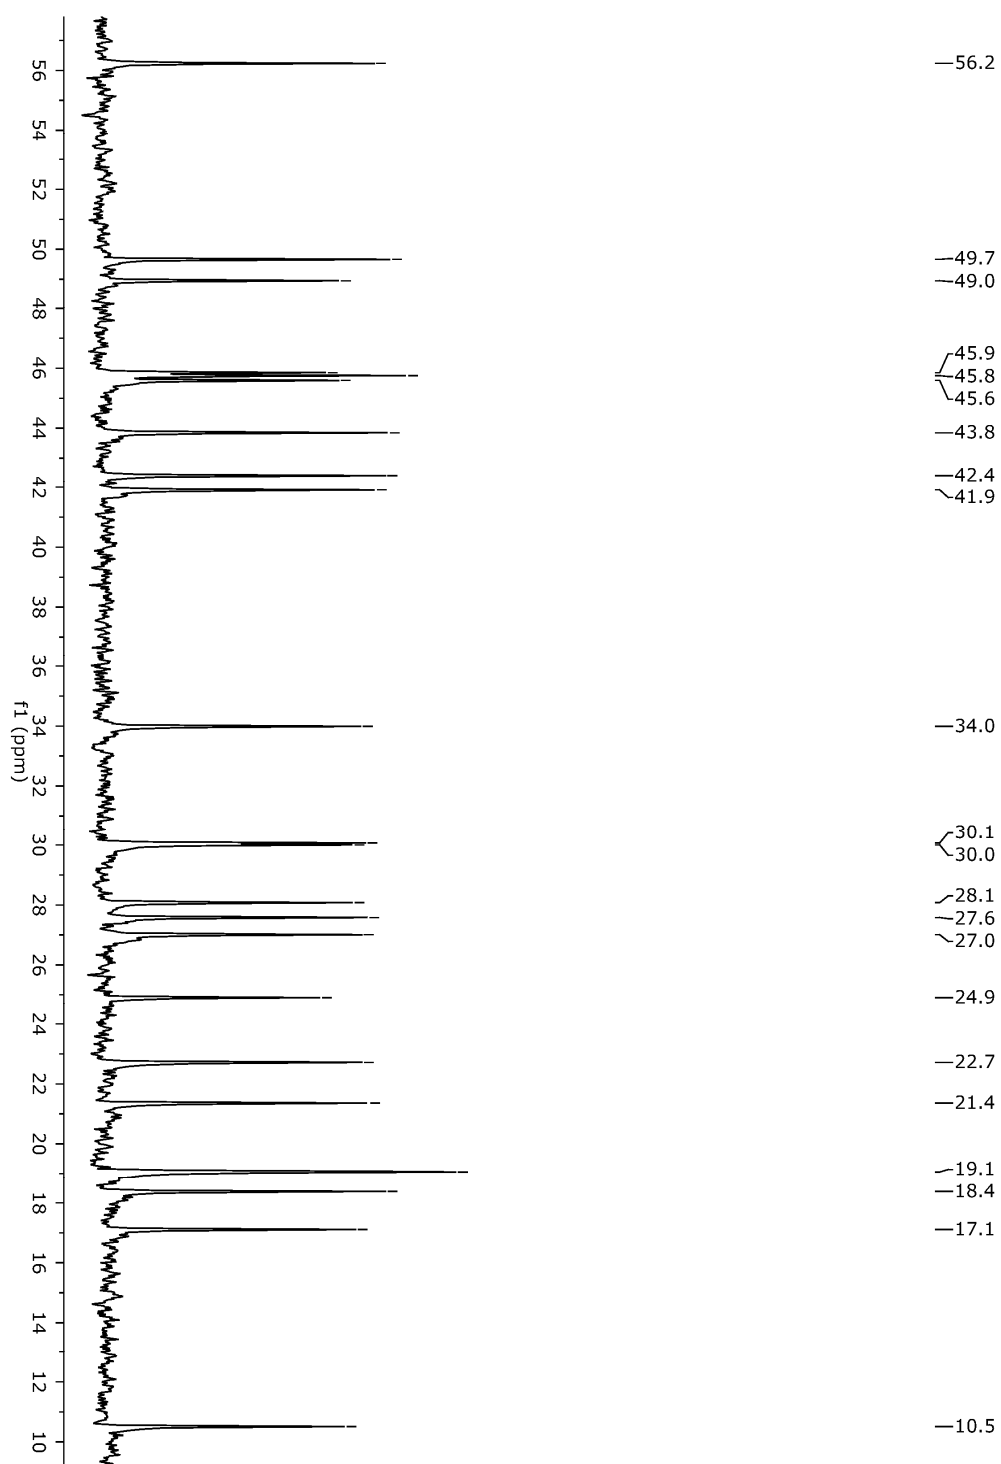

S4. DEPT (135) spectrum of compound **1** at 100 MHz in CDCl<sub>3</sub>.

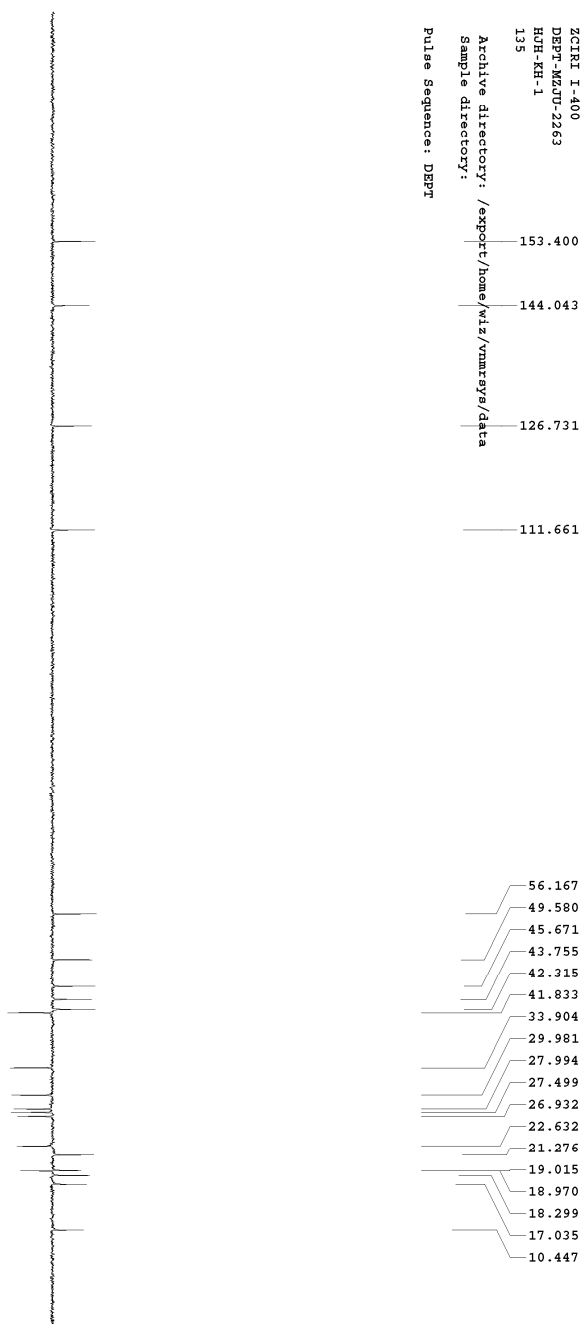

S5. ESI MS (positive mode) spectrum of 1.

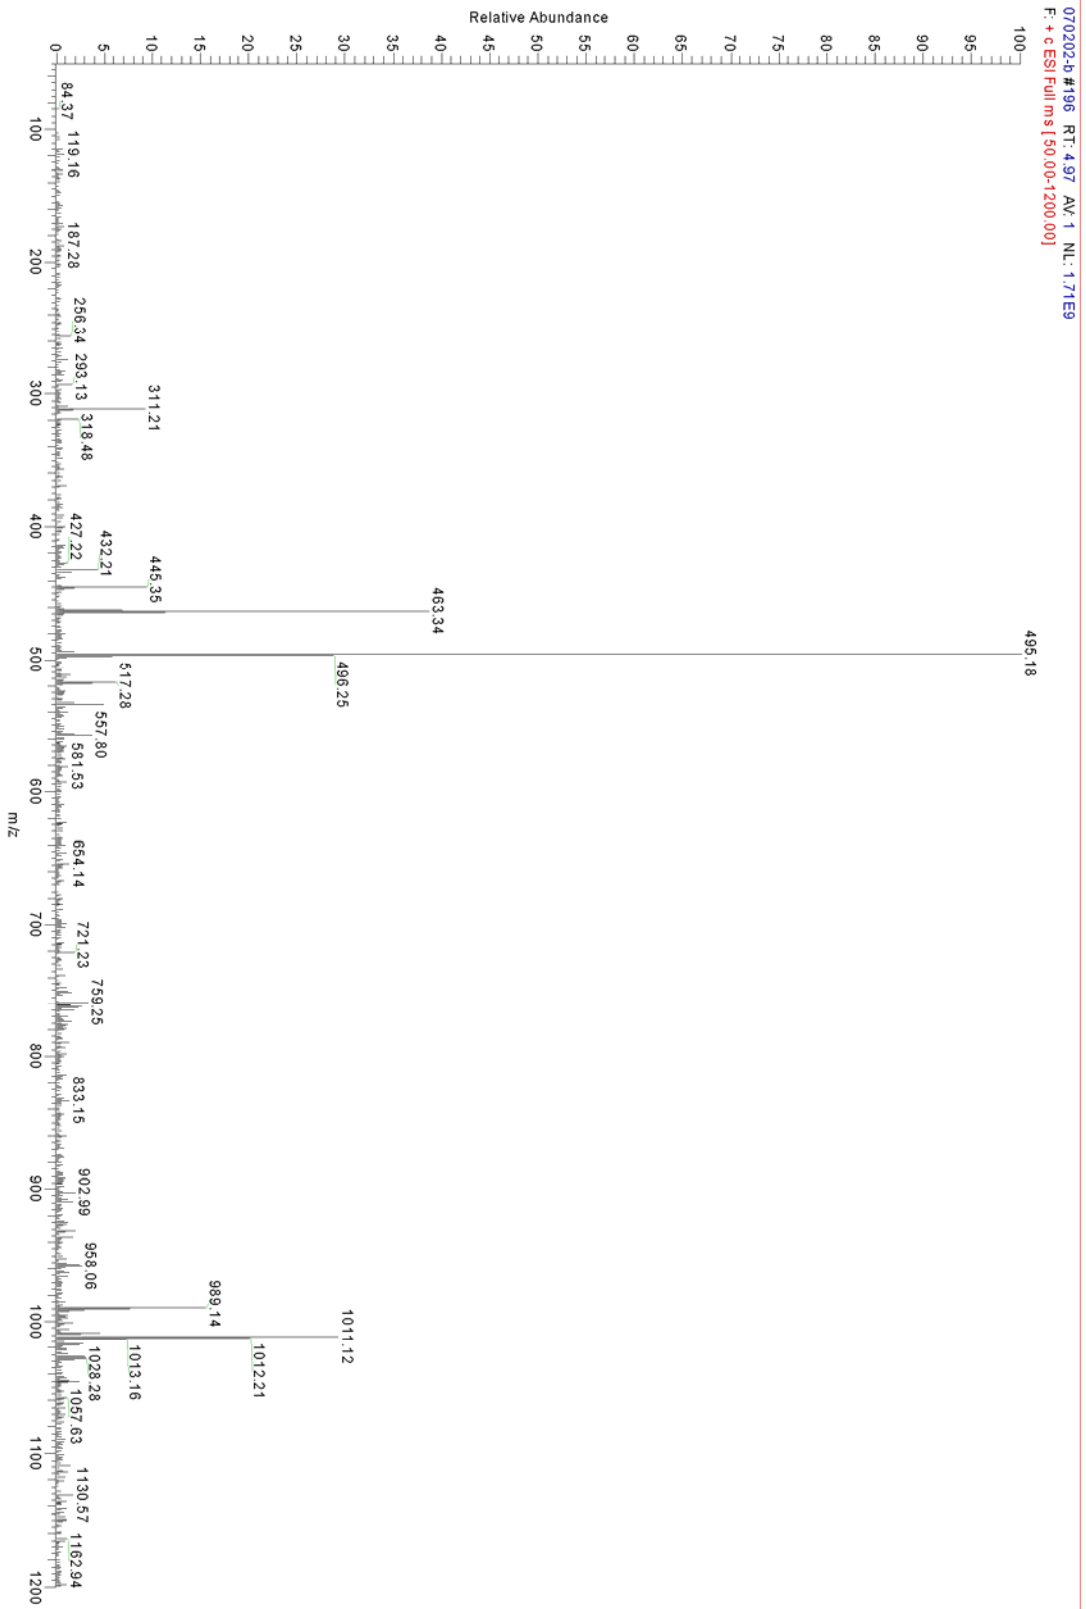

S6. HSQC spectrum of compound **1** at 400 MHz in CDCl<sub>3</sub>.

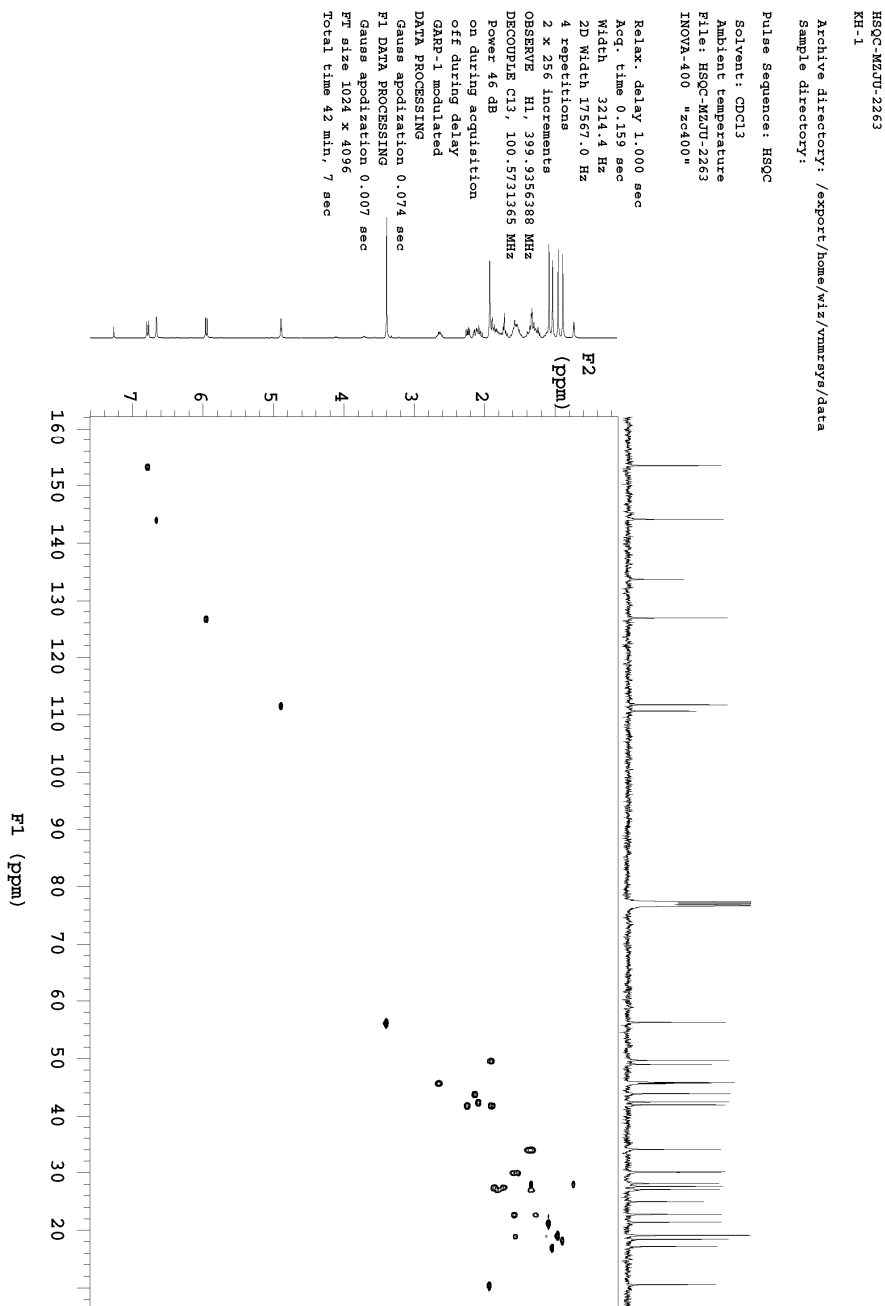



S7.  $^1\text{H}$ - $^1\text{H}$  COSY spectrum of compound **1** at 400 MHz in  $\text{CDCl}_3$ .

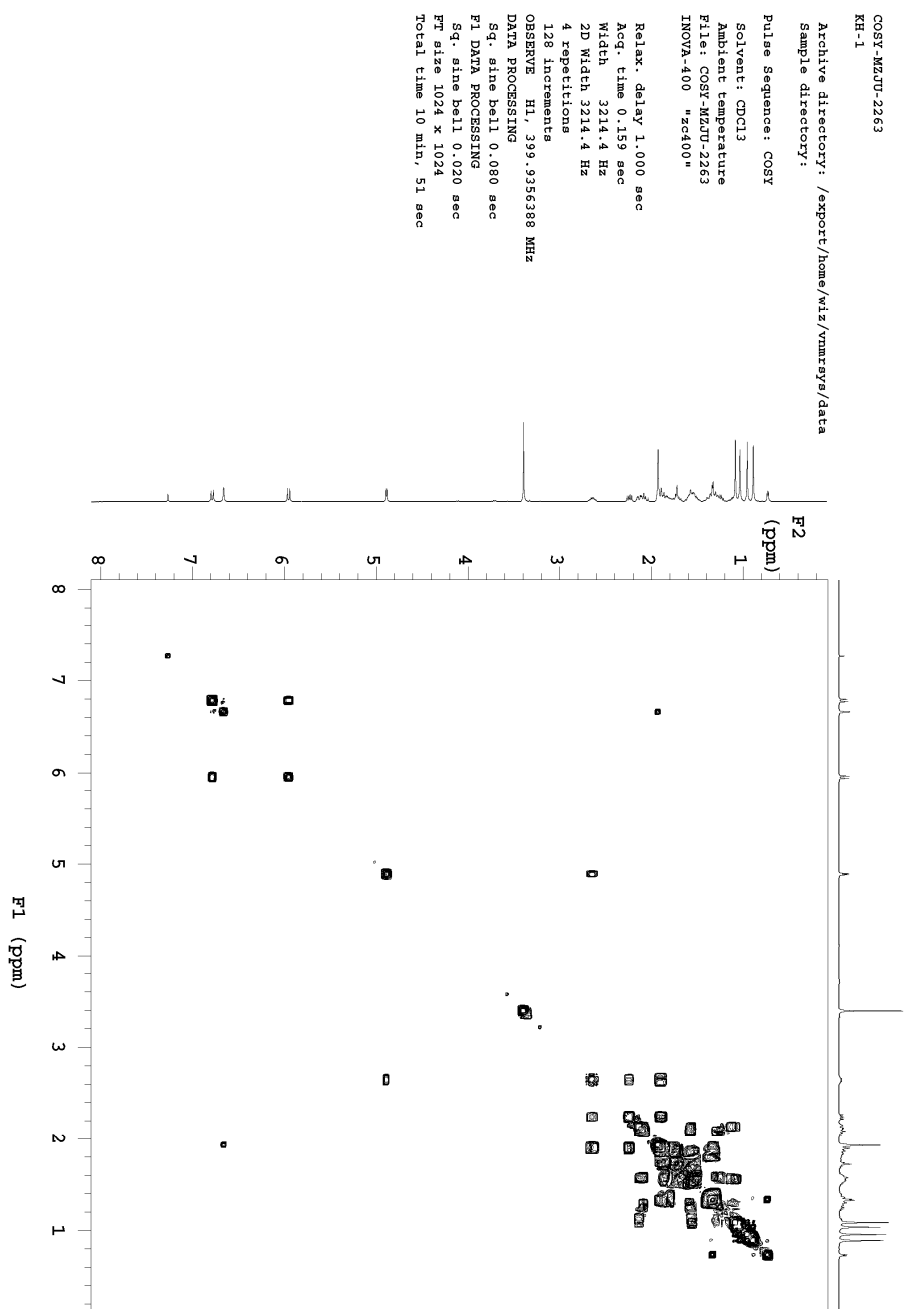

S8. HMBC spectrum of compound 1 at 400 MHz in CDCl<sub>3</sub>.

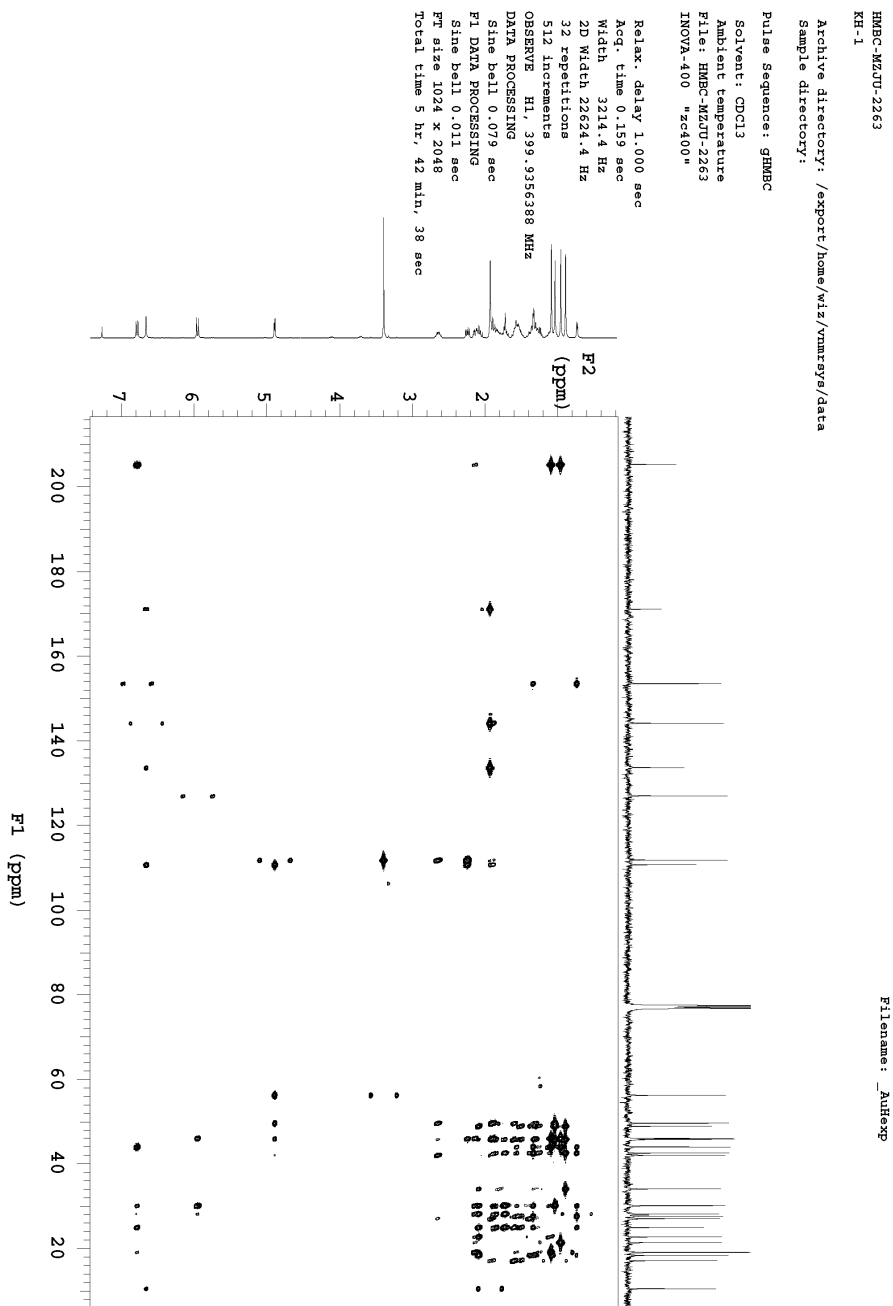

S9. NOESY spectrum of compound **1** at 400 MHz in CDCl<sub>3</sub>.

NOESY-MZTU-2263  
KH-1

Archive directory: /export/home/wiz/vnmrsys/data  
Sample directory:

Pulse Sequence: NOESY

Solvent: CDCl<sub>3</sub>  
Ambient temperature  
File: NOESY-MZTU-2263  
INOVA-400 "sc400"

Relax. delay 1.000 sec  
Mixing 0.700 sec  
Acq. time 0.159 sec  
Width 3214.4 Hz  
2D Width 3214.4 Hz  
32 repetitions  
2 x 200 increments  
OBSERVE H1, 399.9356388 MHz  
DATA PROCESSING  
Gauss apodization 0.067 sec  
F1 DATA PROCESSING  
Gauss apodization 0.029 sec  
F2 size 2048 x 2048  
Total time 6 hr, 47 min, 10 sec

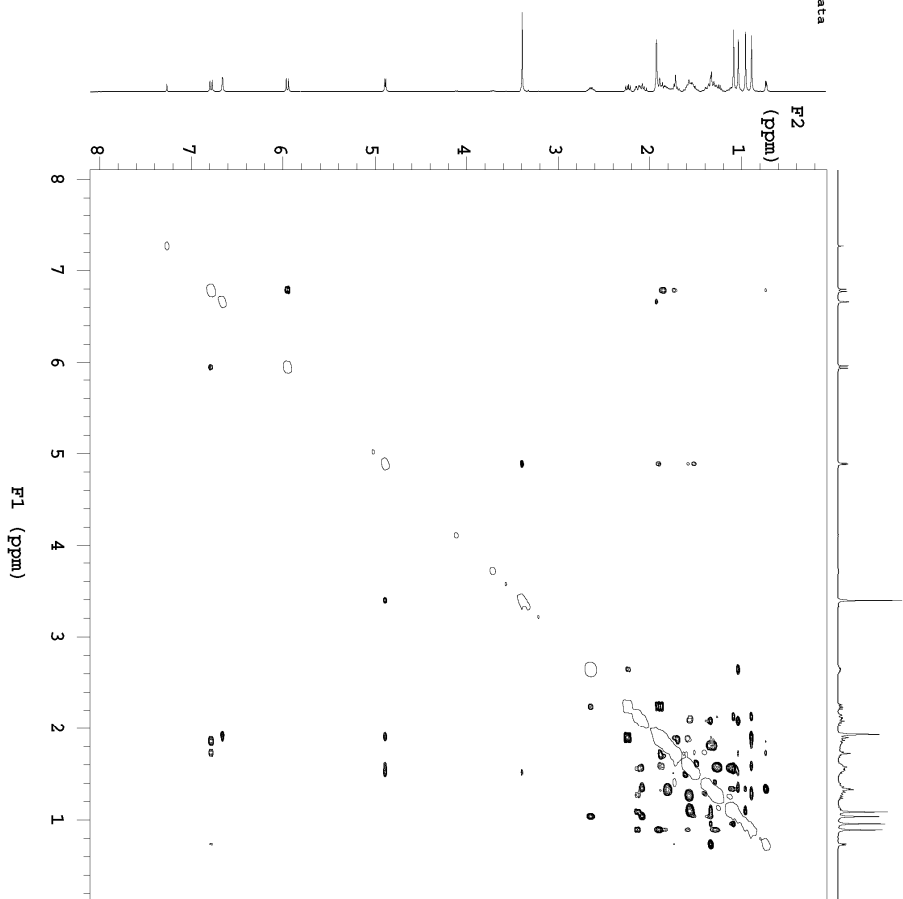

S10. IR (KBr disc) spectrum of compound 1.

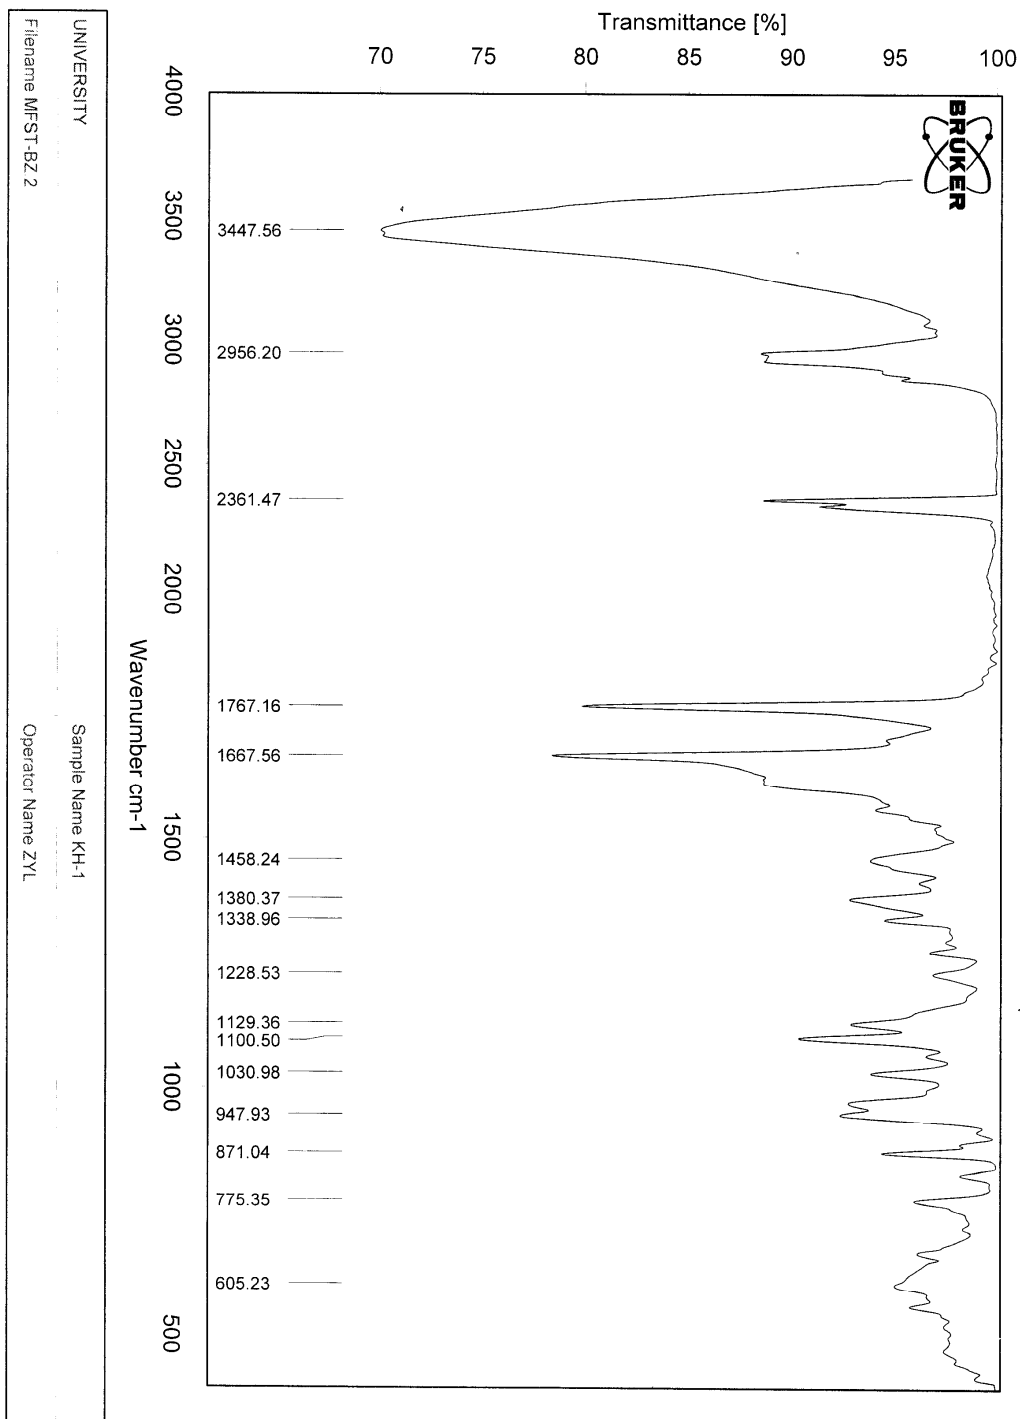

S11.  $^1\text{H}$  NMR spectrum of compound **2** and **3** in a mixture at 400 MHz in  $\text{CDCl}_3$ .

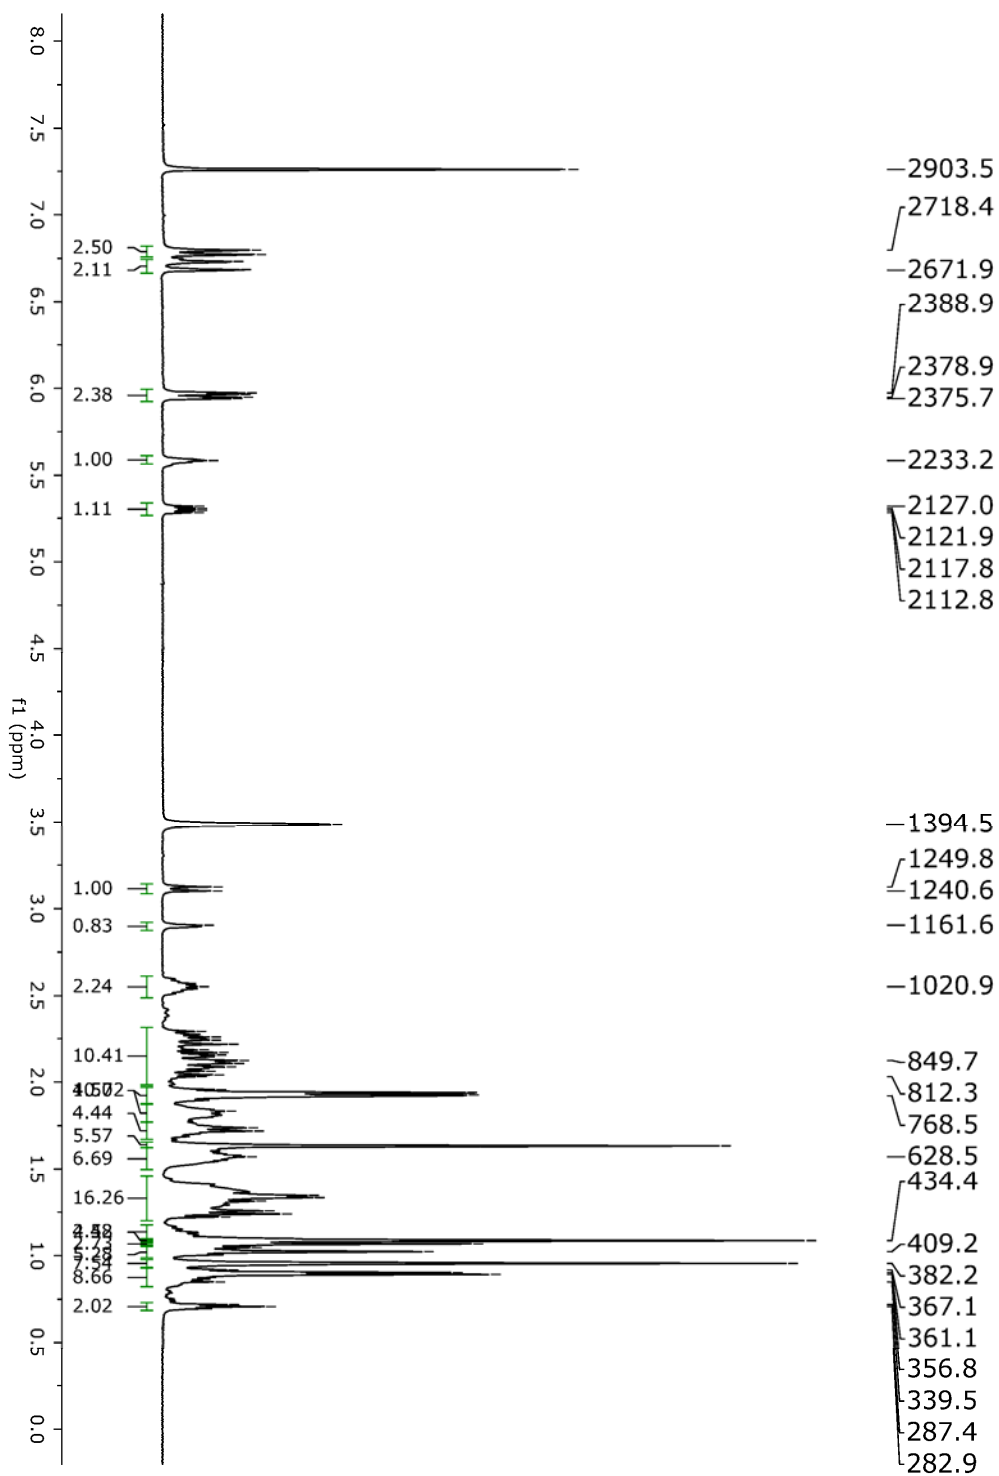

S12.  $^1\text{H}$  NMR spectrum (high field, expanded) of compound **2** and **3** in a mixture at 400 MHz in  $\text{CDCl}_3$ .

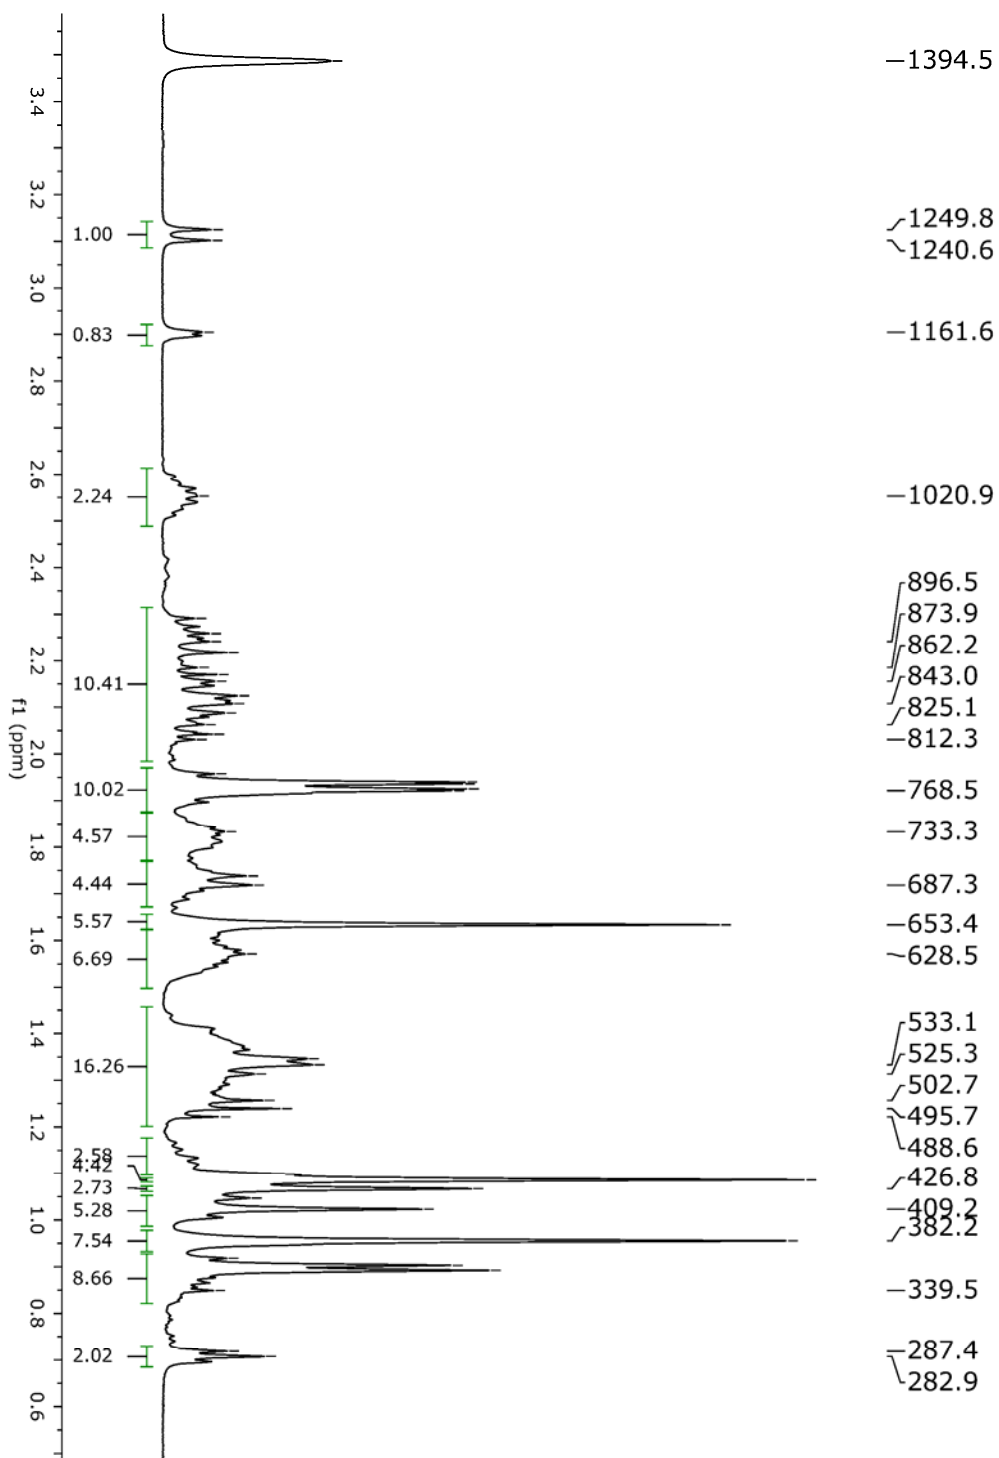

S13.  $^{13}\text{C}$  NMR spectrum of compound **2** and **3** in a mixture at 100 MHz in  $\text{CDCl}_3$ .

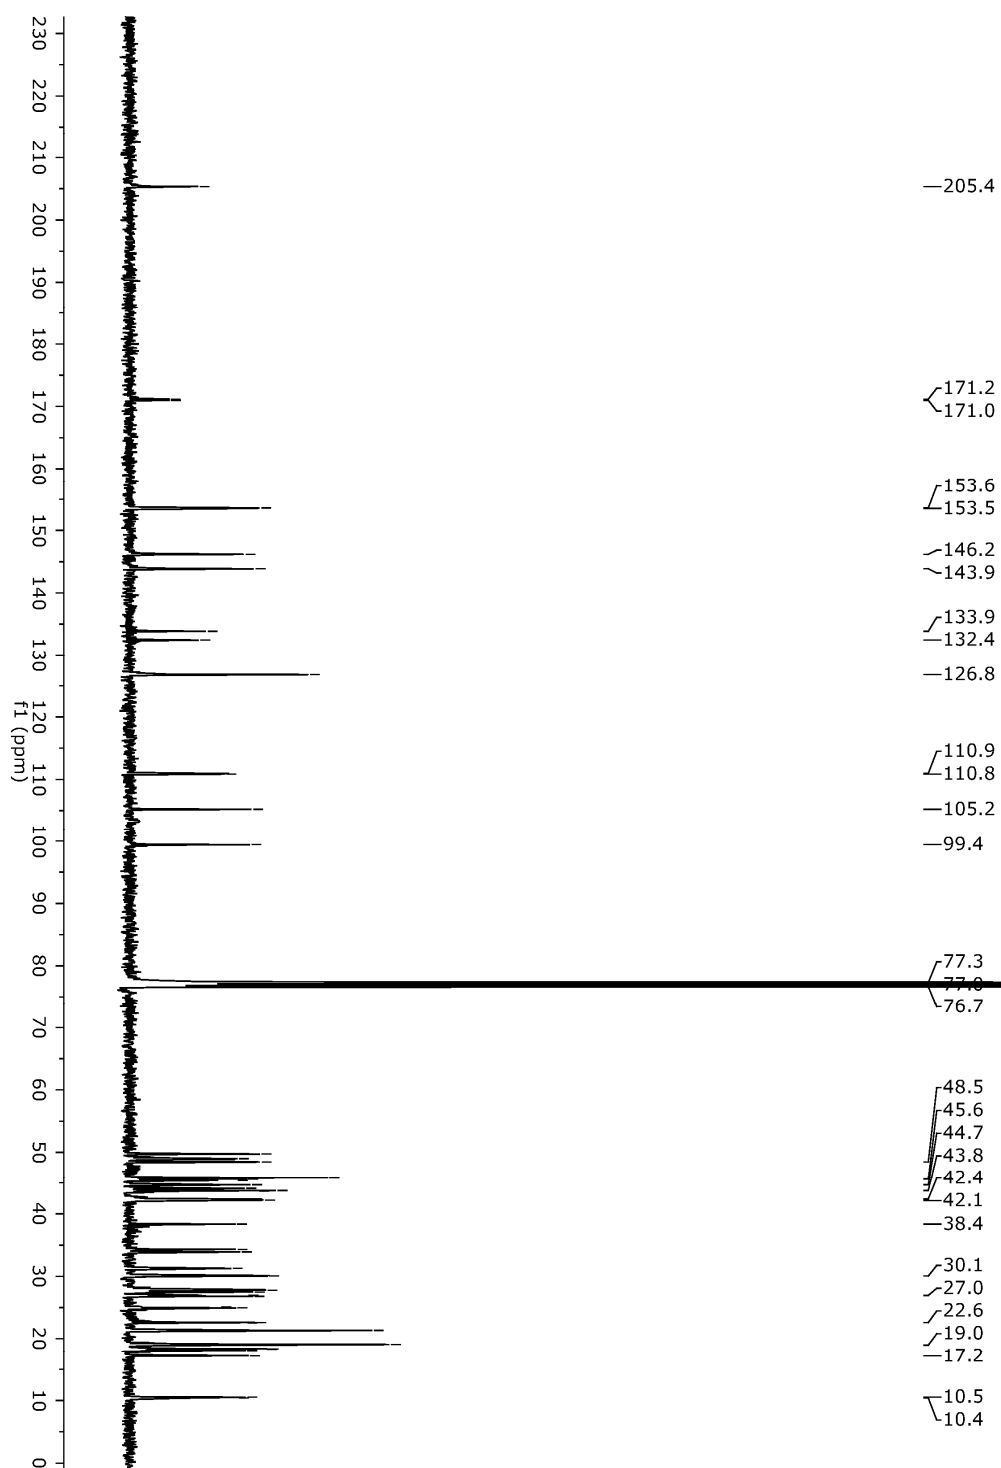

S14.  $^{13}\text{C}$  NMR spectrum (high field, expanded) of compound **2** and **3** in a mixture at 100 MHz in  $\text{CDCl}_3$ .

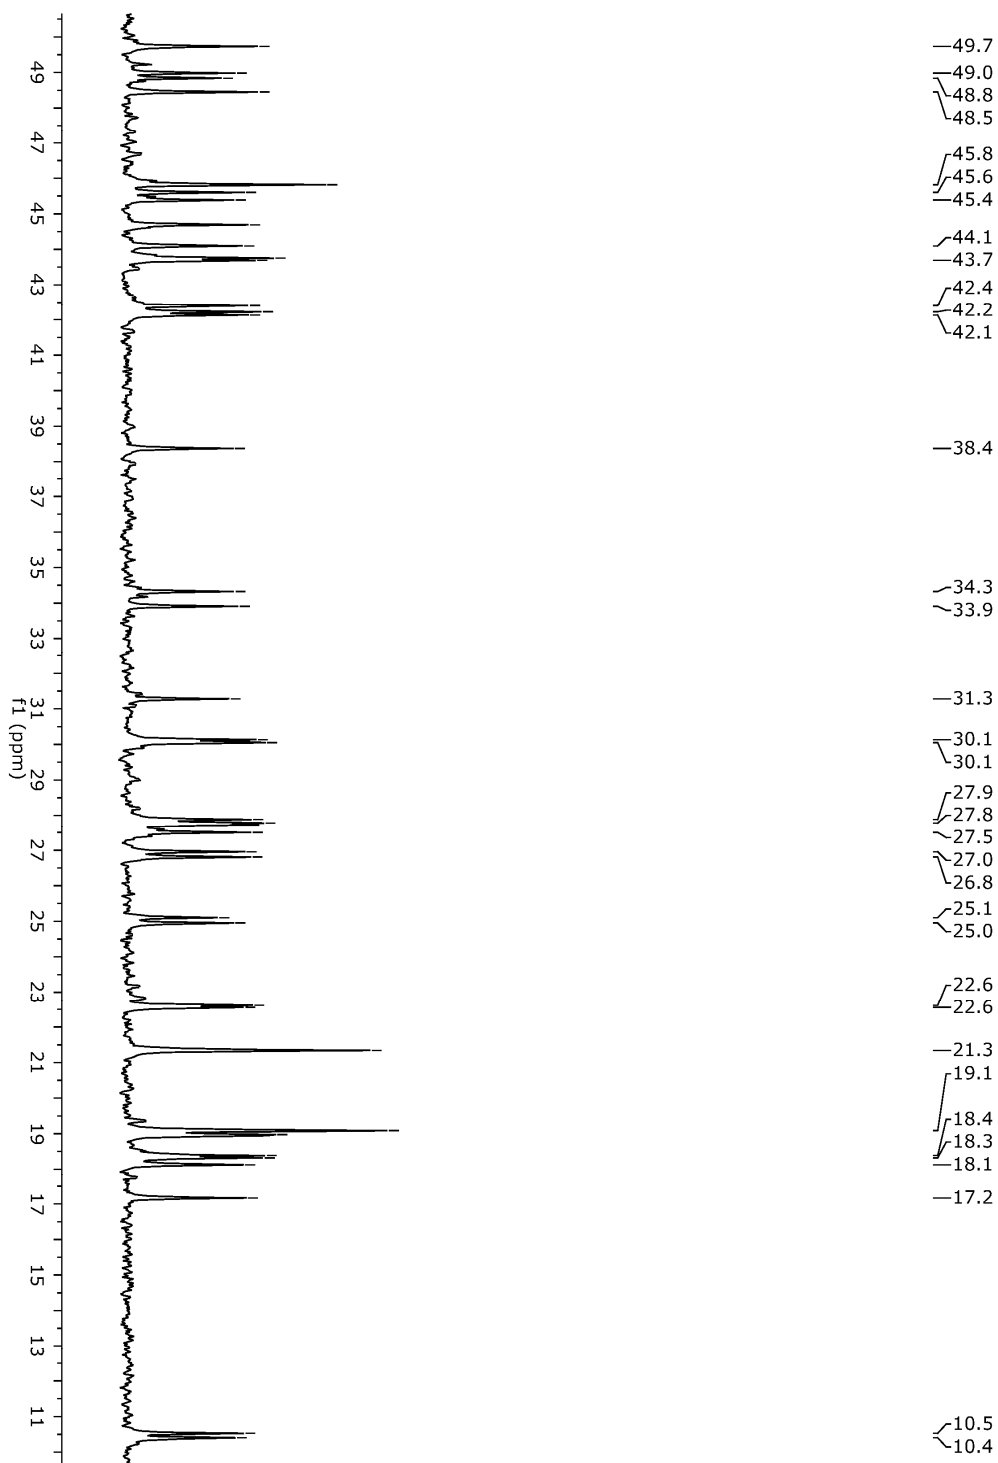



S15. DEPT (135) spectrum of compound **2** and **3** in a mixture at 100 MHz in CDCl<sub>3</sub>.

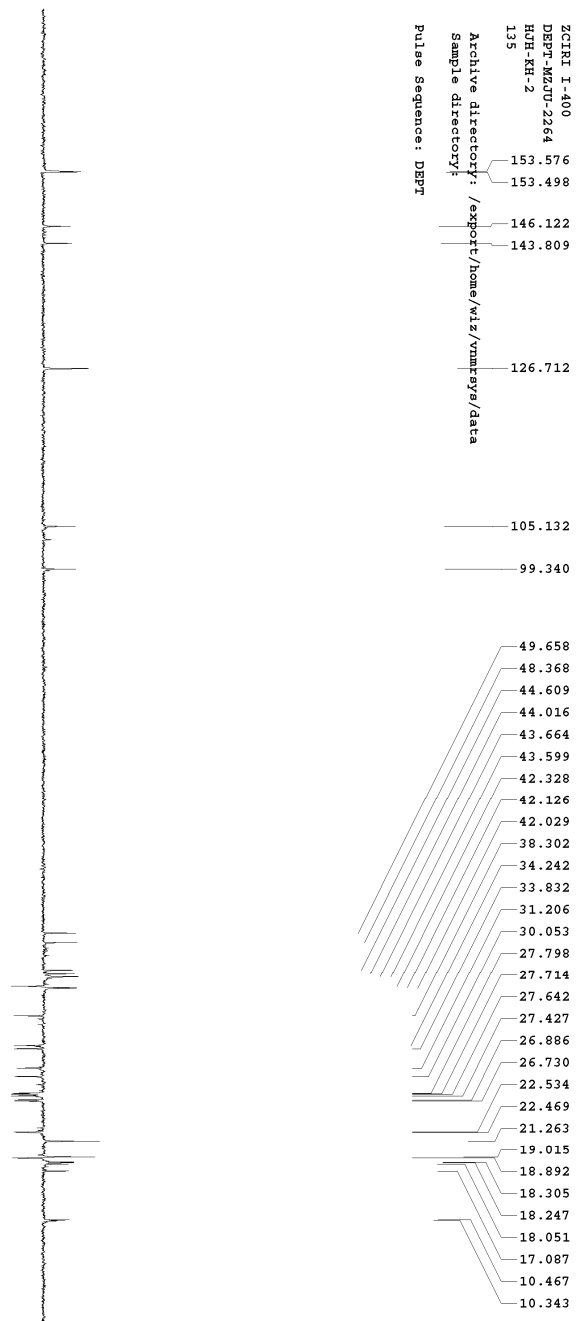

S16. HSQC (undecoupling) spectrum of compound **2** and **3** in a mixture at 400 MHz in CDCl<sub>3</sub>.

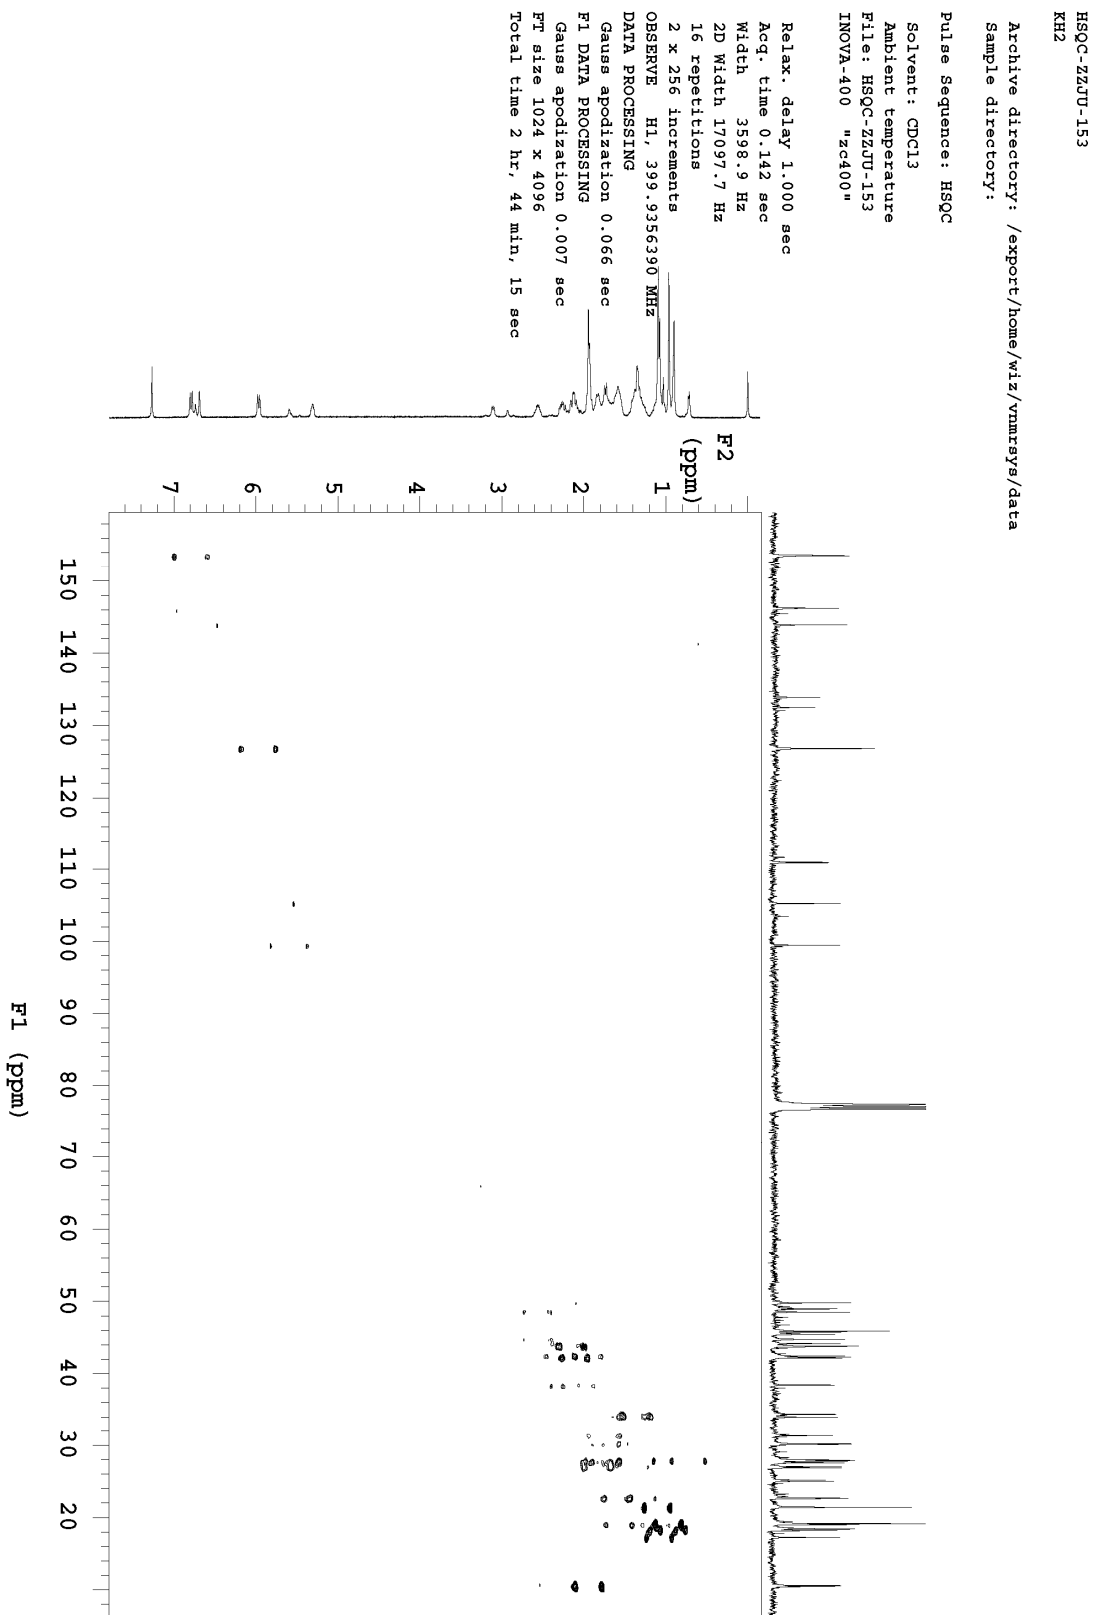

S17. HMBC spectrum of compound **2** and **3** in a mixture at 400 MHz in CDCl<sub>3</sub>.

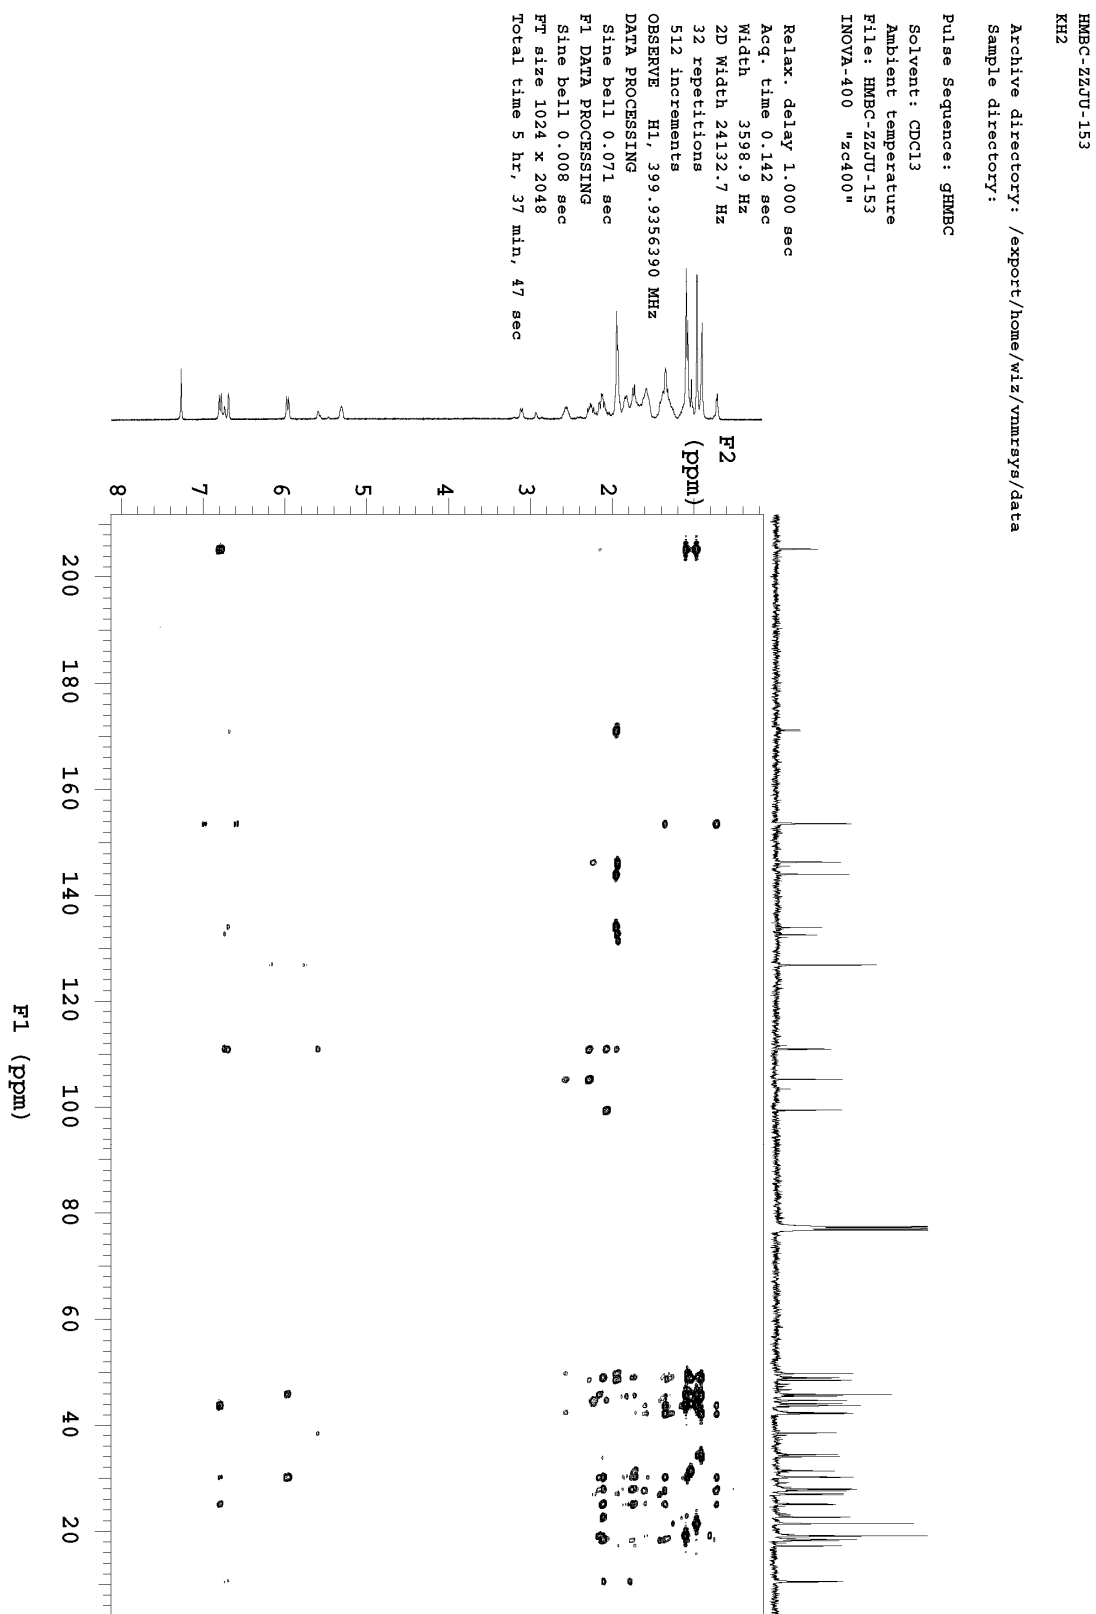

S18. NOESY spectrum of compound **2** and **3** in a mixture at 400 MHz in CDCl<sub>3</sub>.

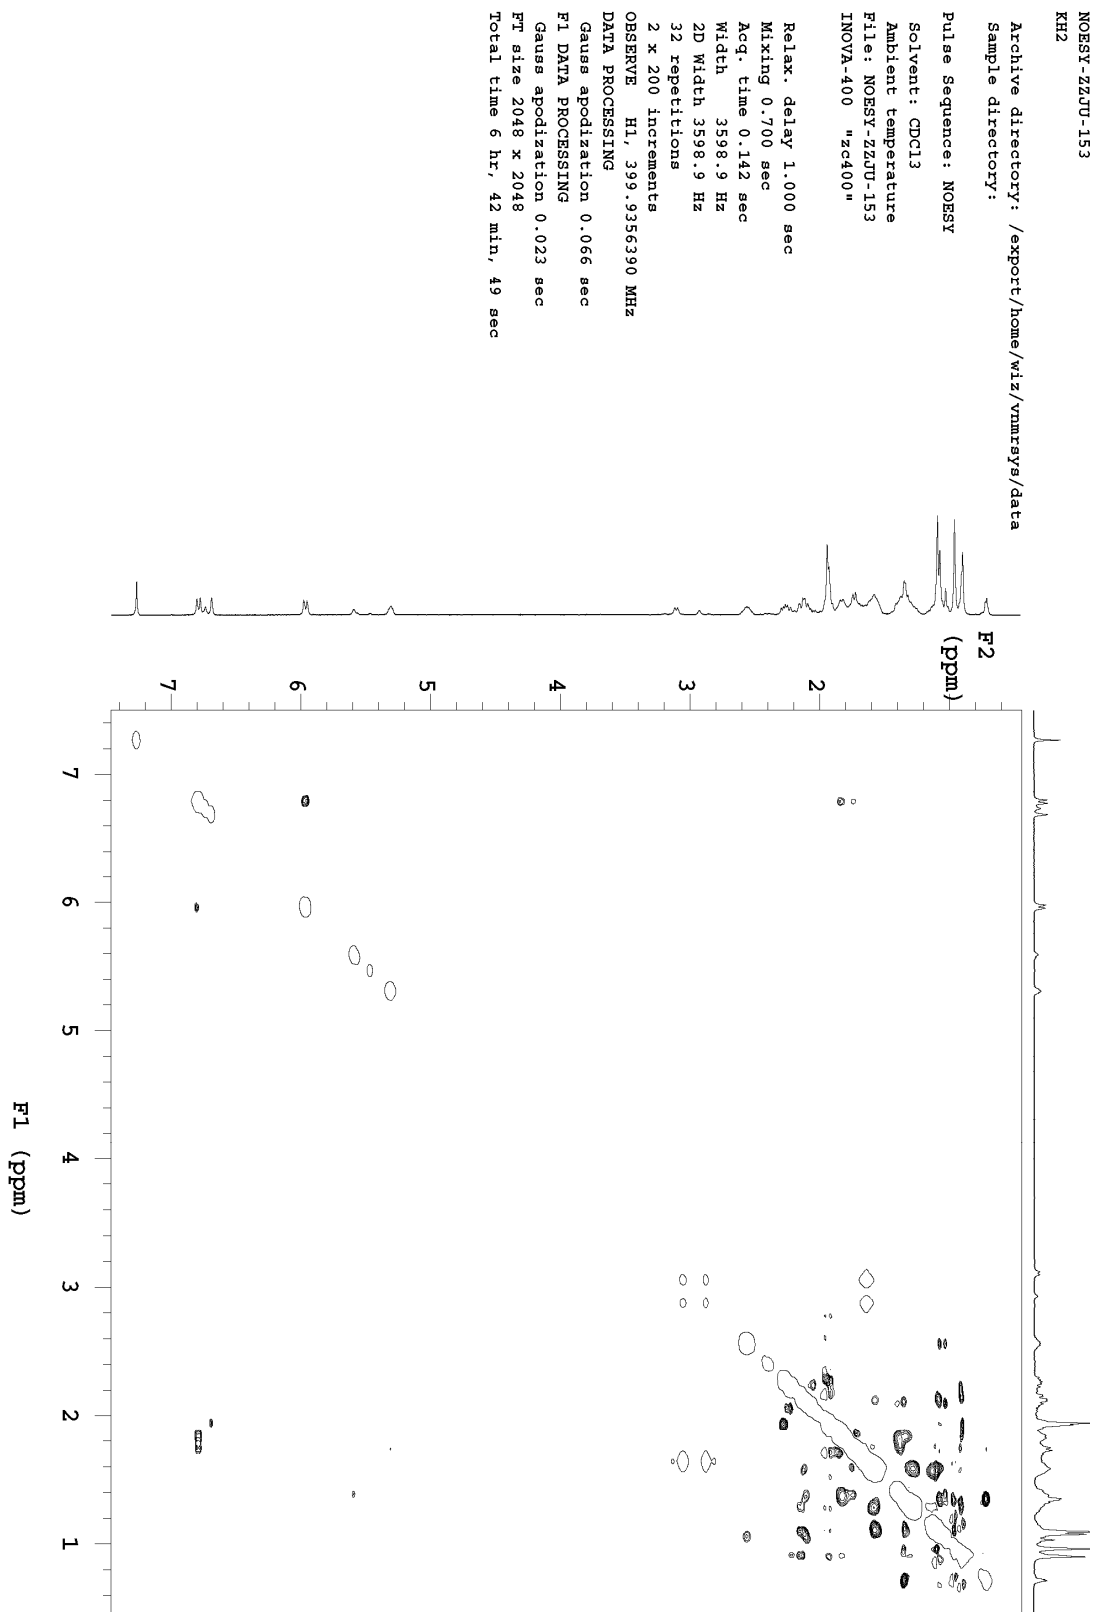

S19. IR (KBr disc) spectrum of compound **2** and **3** in a mixture.

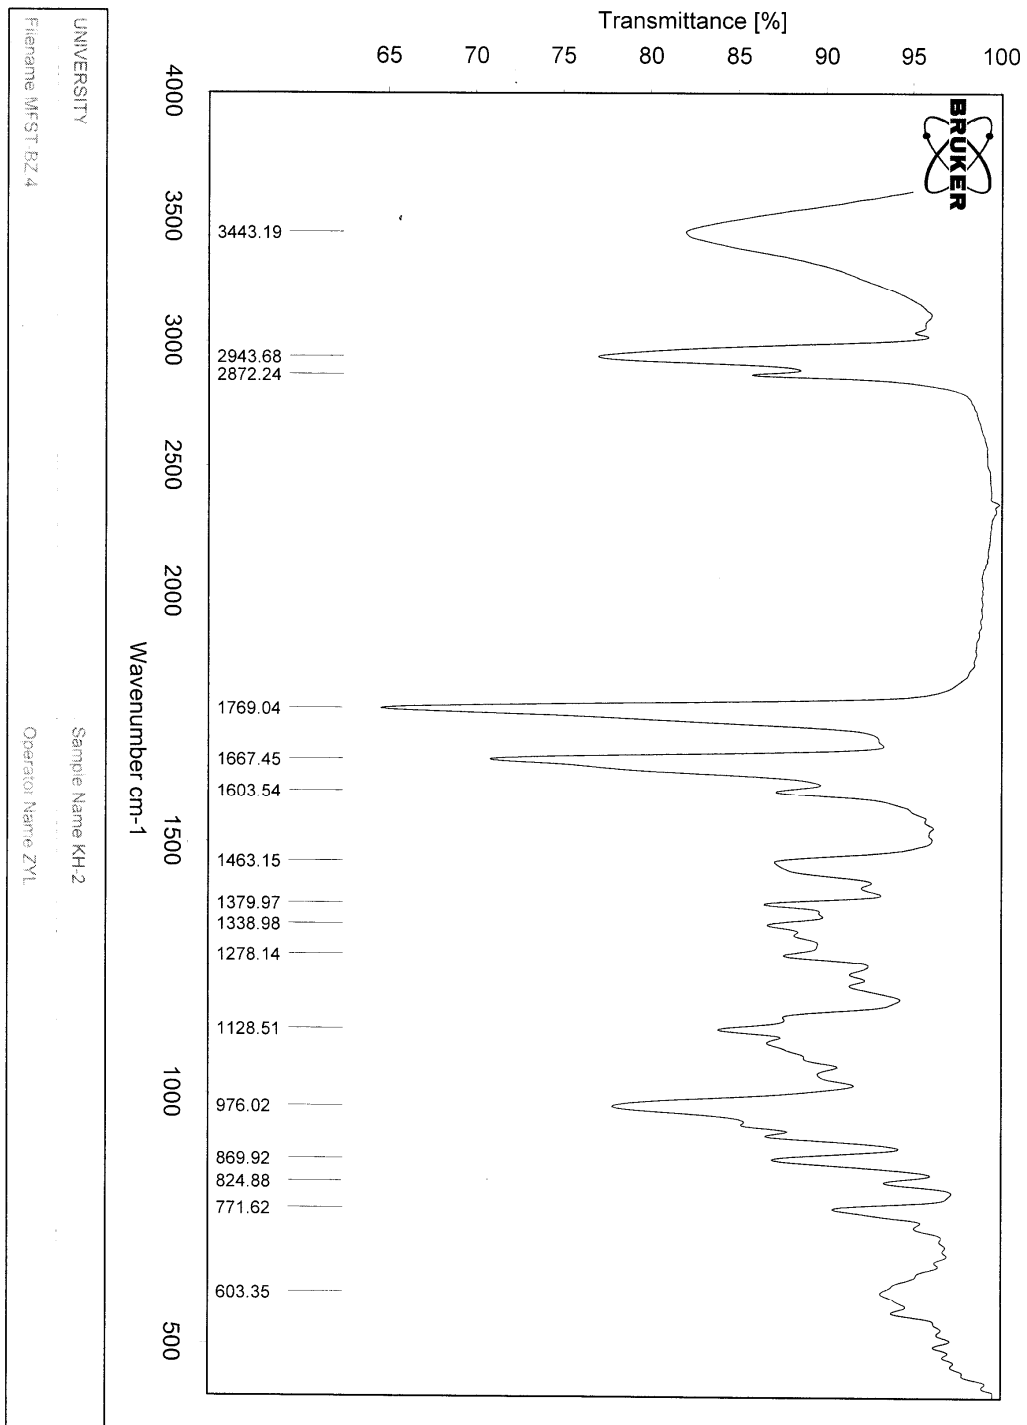

S20.  $^1\text{H}$  NMR spectrum of compound **4** at 400 MHz in  $\text{CDCl}_3$ .

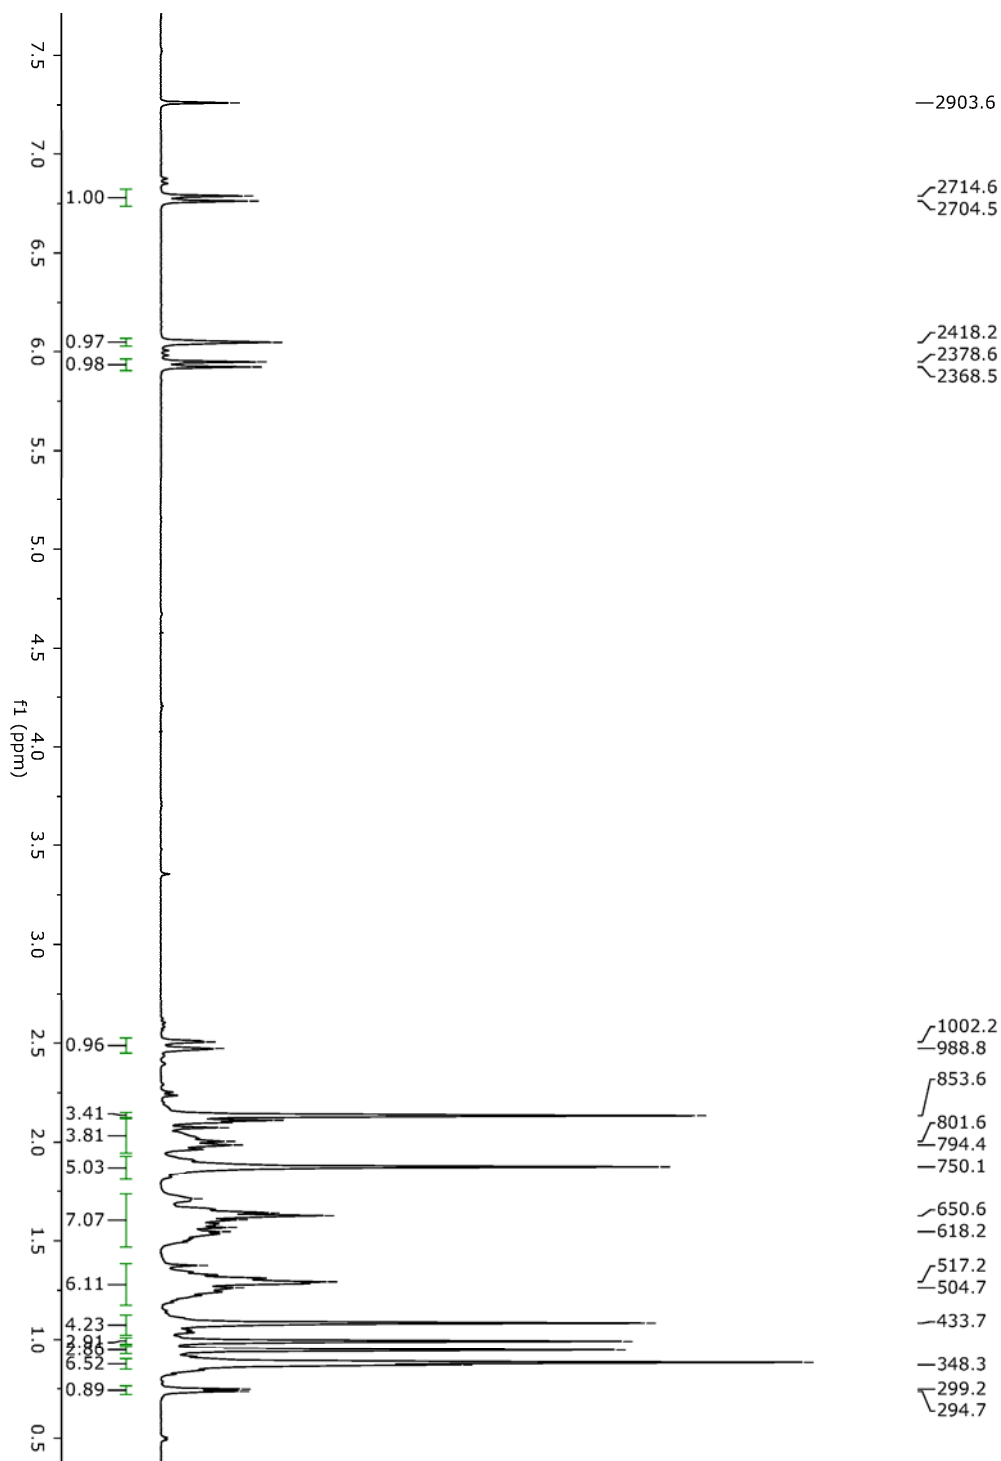

S21.  $^{13}\text{C}$  NMR spectrum of compound **4** at 100 MHz in  $\text{CDCl}_3$ .

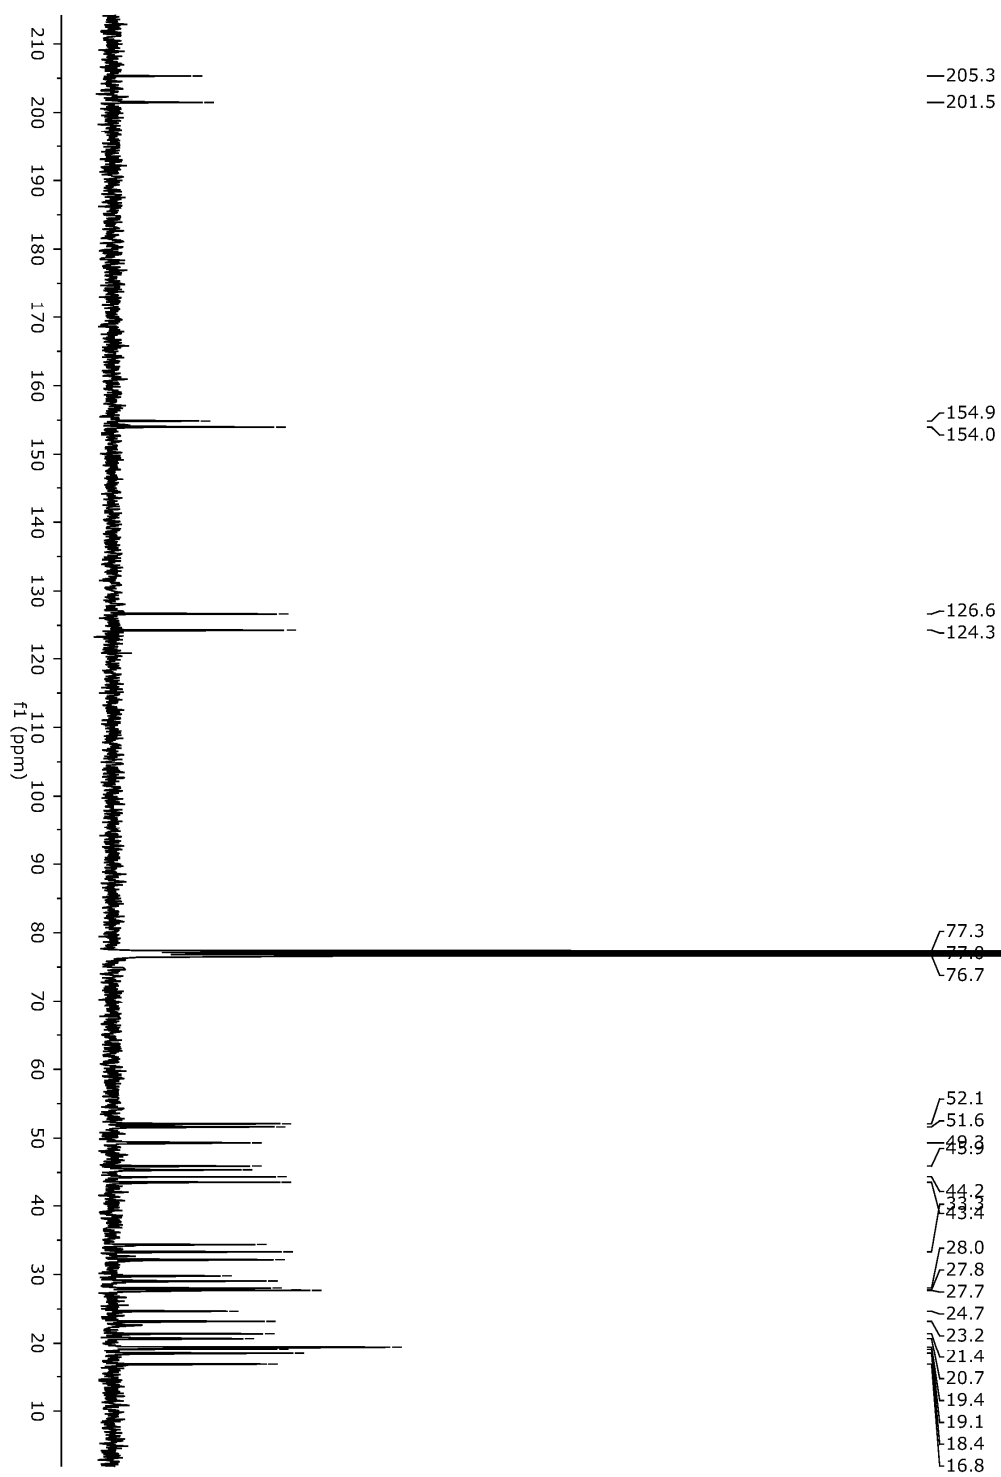

S22.  $^{13}\text{C}$  NMR spectrum (high field, expanded) of compound **4** at 100 MHz in  $\text{CDCl}_3$ .

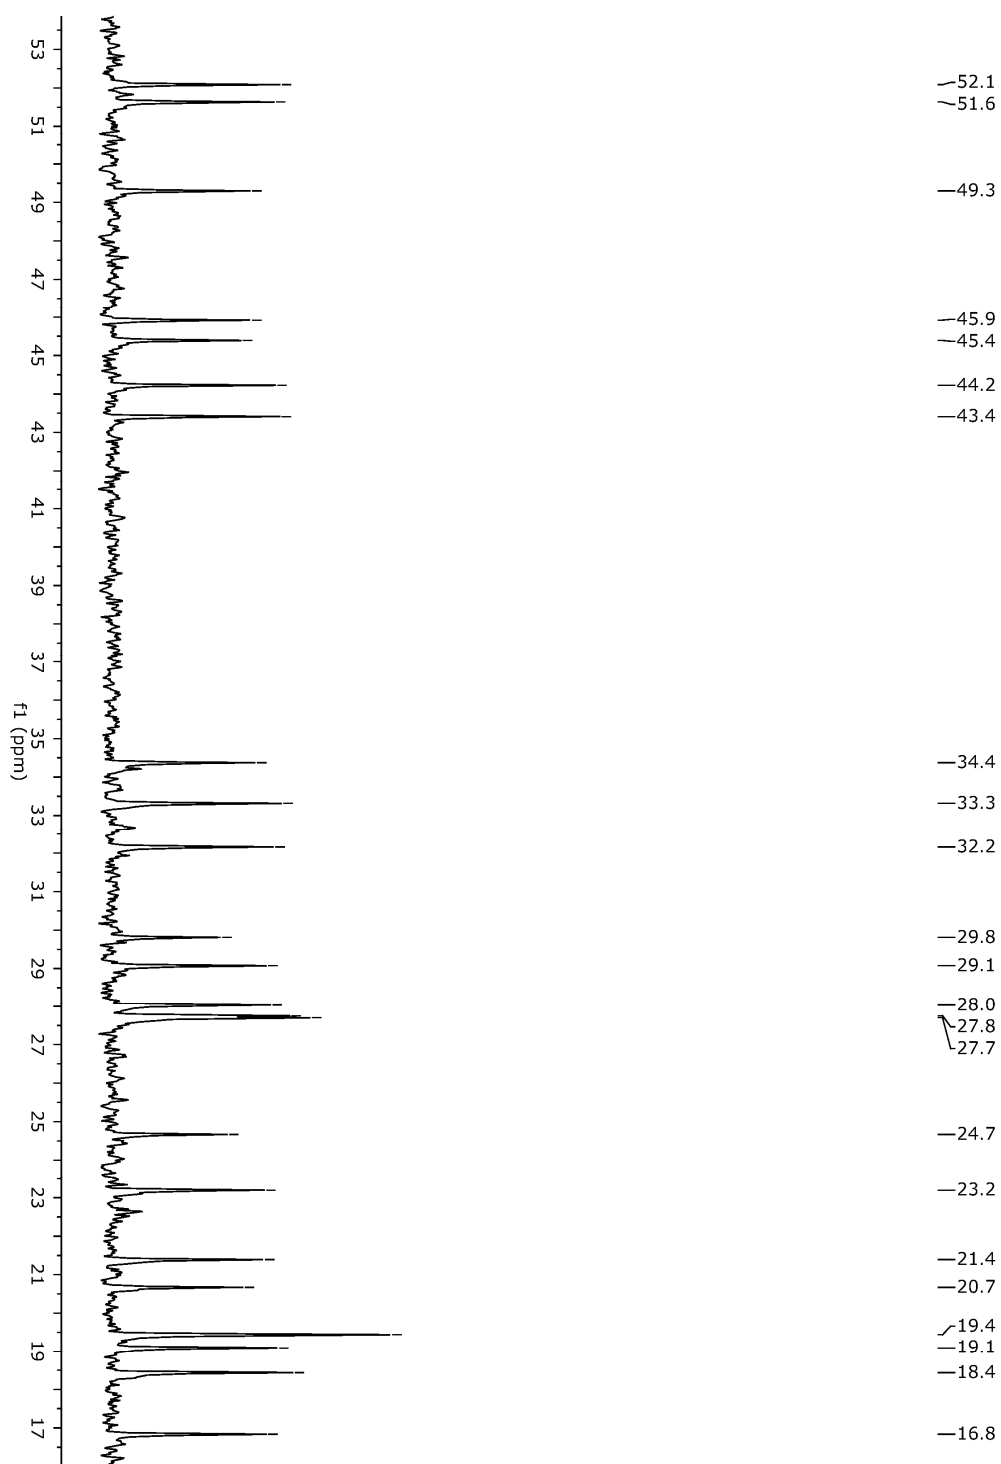



S23. DEPT (135) spectrum of compound **4** at 100 MHz in CDCl<sub>3</sub>.

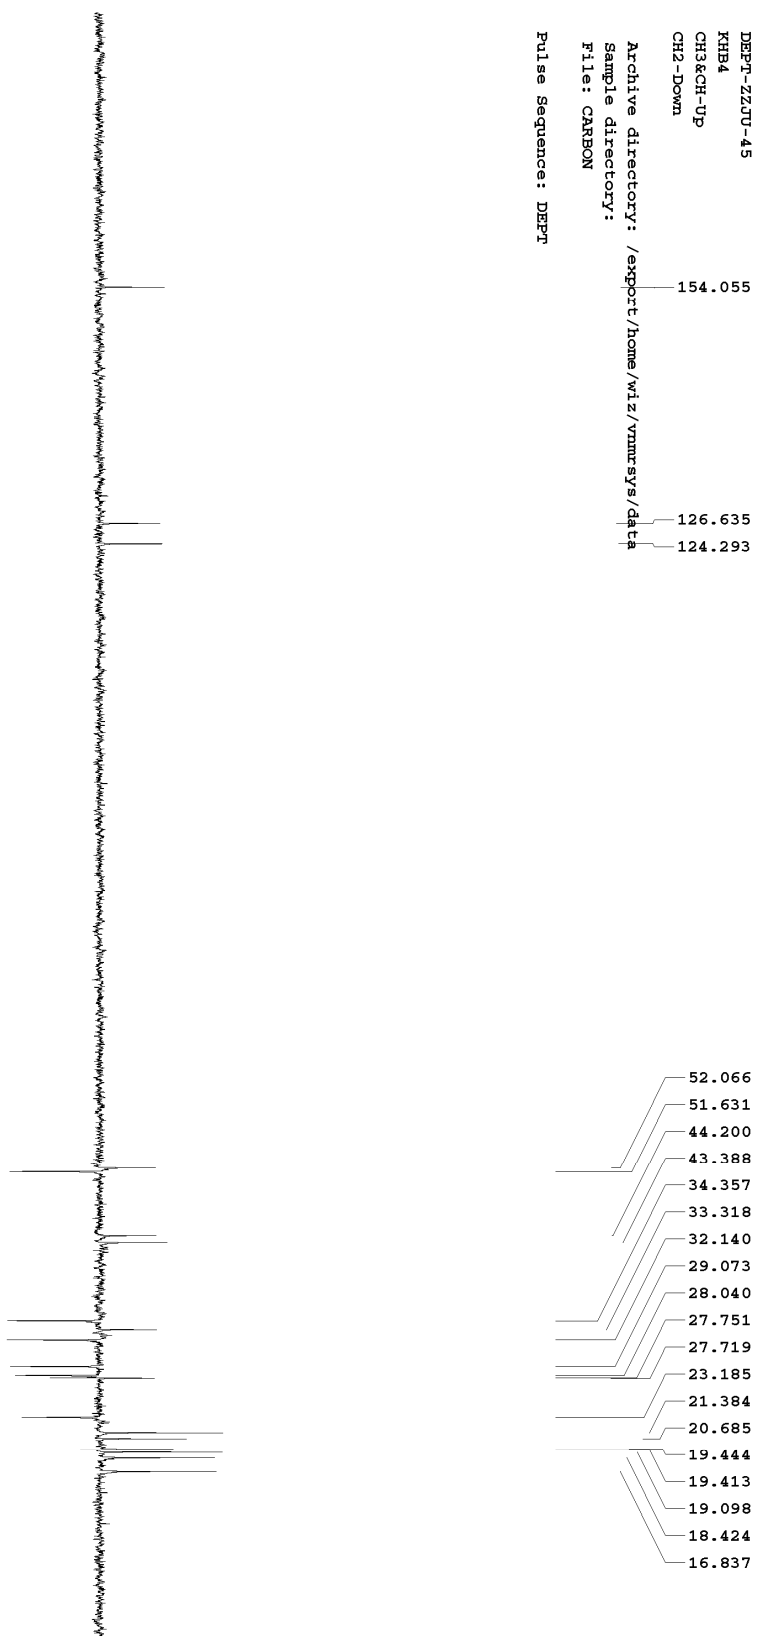

S24. HSQC (undecoupling) spectrum of compound **4** at 400 MHz in CDCl<sub>3</sub>.

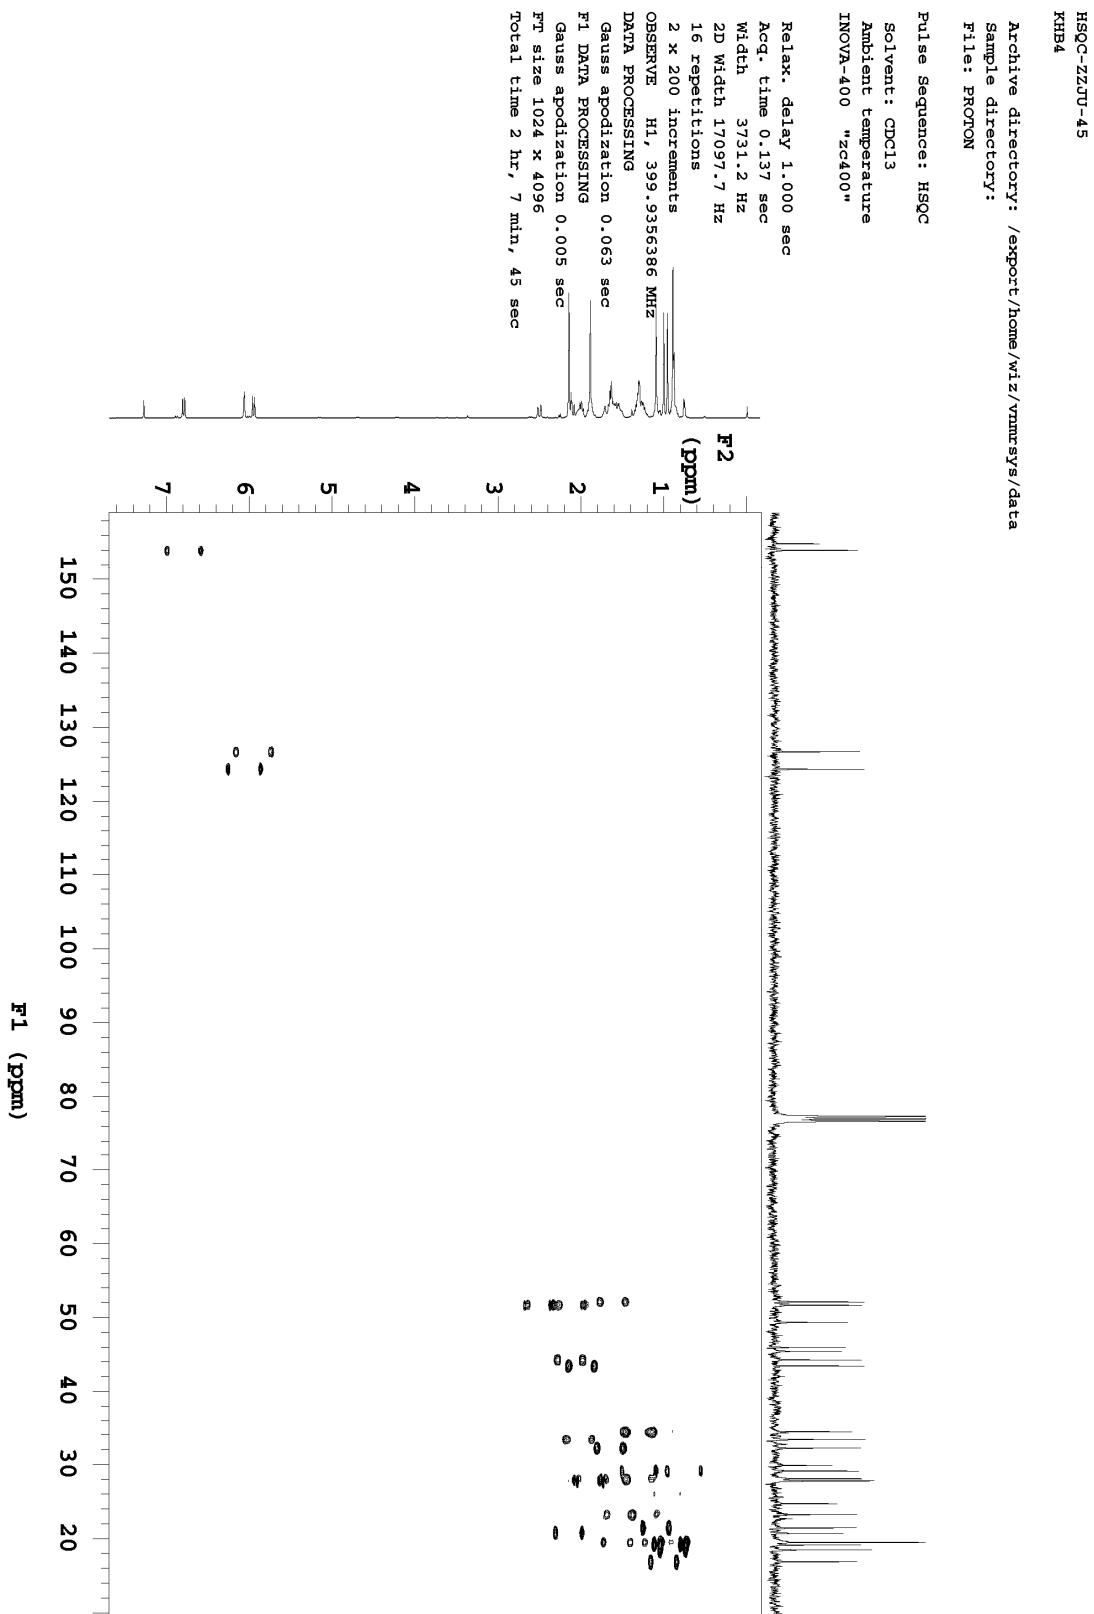

S25. HMBC spectrum of compound **4** at 400 MHz in CDCl<sub>3</sub>.

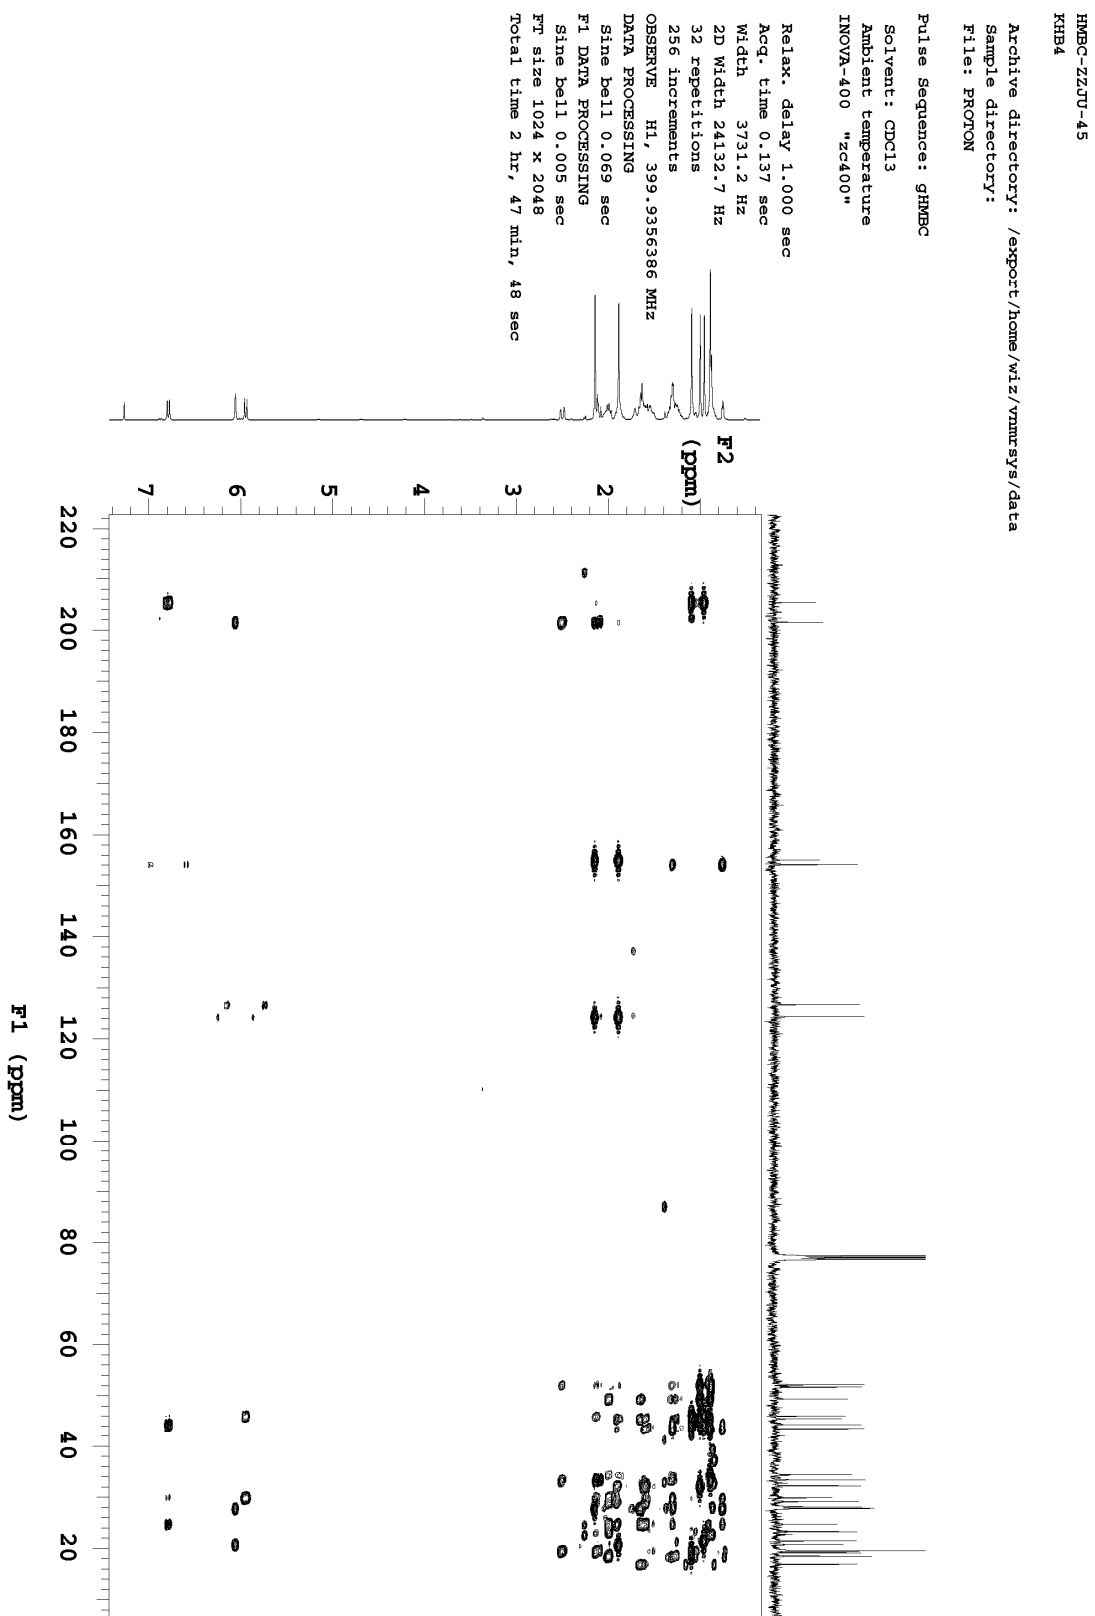

S26. NOESY spectrum of compound **4** at 400 MHz in CDCl<sub>3</sub>.

noesy-zzju-45  
KHB4

Archive directory: /export/home/wiz/vnmrsys/data  
Sample directory:  
File: PROTON

Pulse Sequence: NOESY

Solvent: CDCl<sub>3</sub>  
Ambient temperature  
INOVA-400 "zc400"

Relax. delay 1.000 sec

Mixing 0.700 sec

Acq. time 0.137 sec

Width 3731.2 Hz

2D Width 3731.2 Hz

16 repetitions

2 x 200 increments

OBSERVE H1, 399.9356386 MHz

DATA PROCESSING

Gauss apodization 0.063 sec

F1 DATA PROCESSING

Gauss apodization 0.049 sec

FF size 2048 x 2048

Total time 3 hr, 21 min, 15 sec

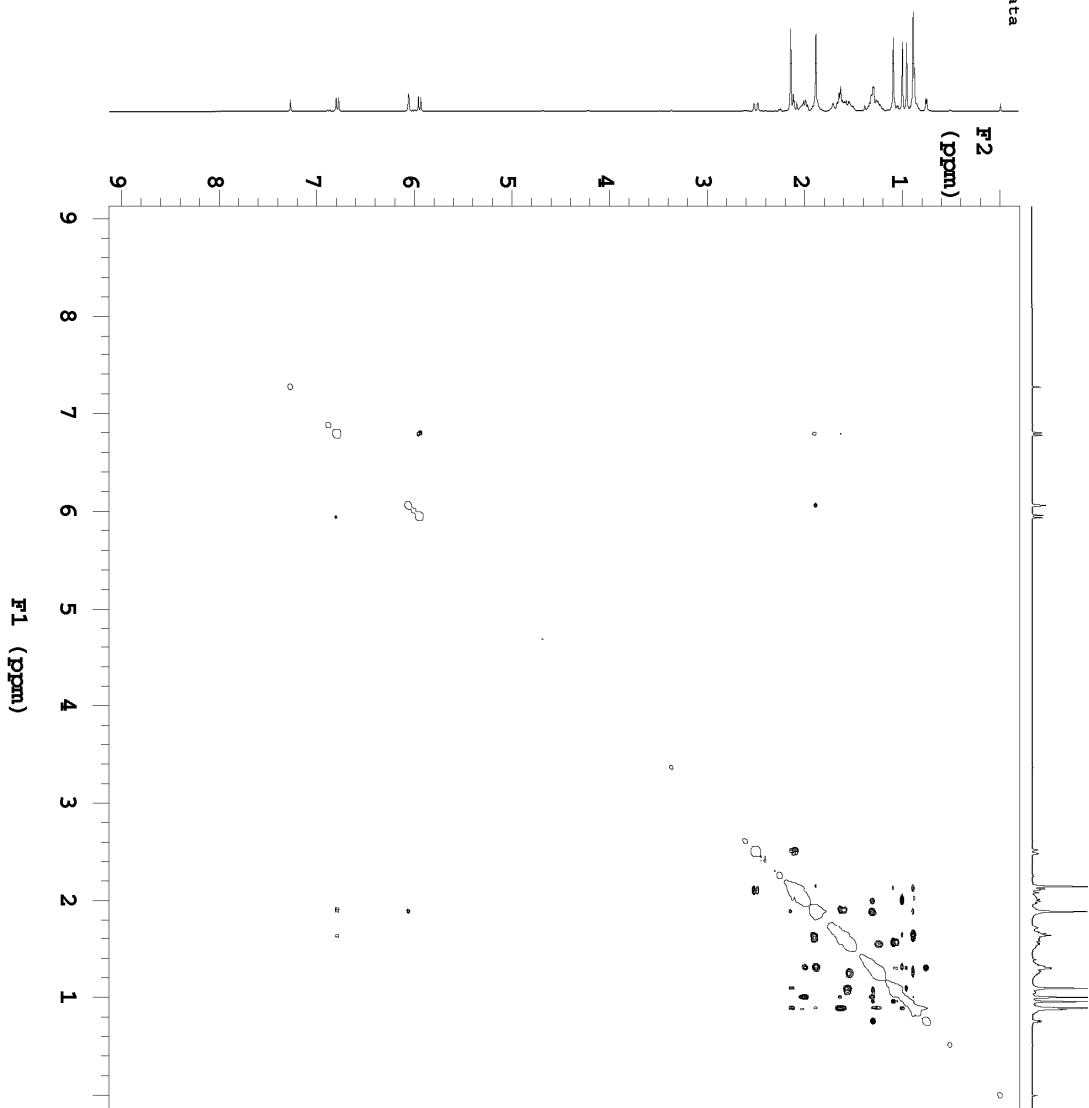

S27. IR (KBr disc) spectrum of compound 4.

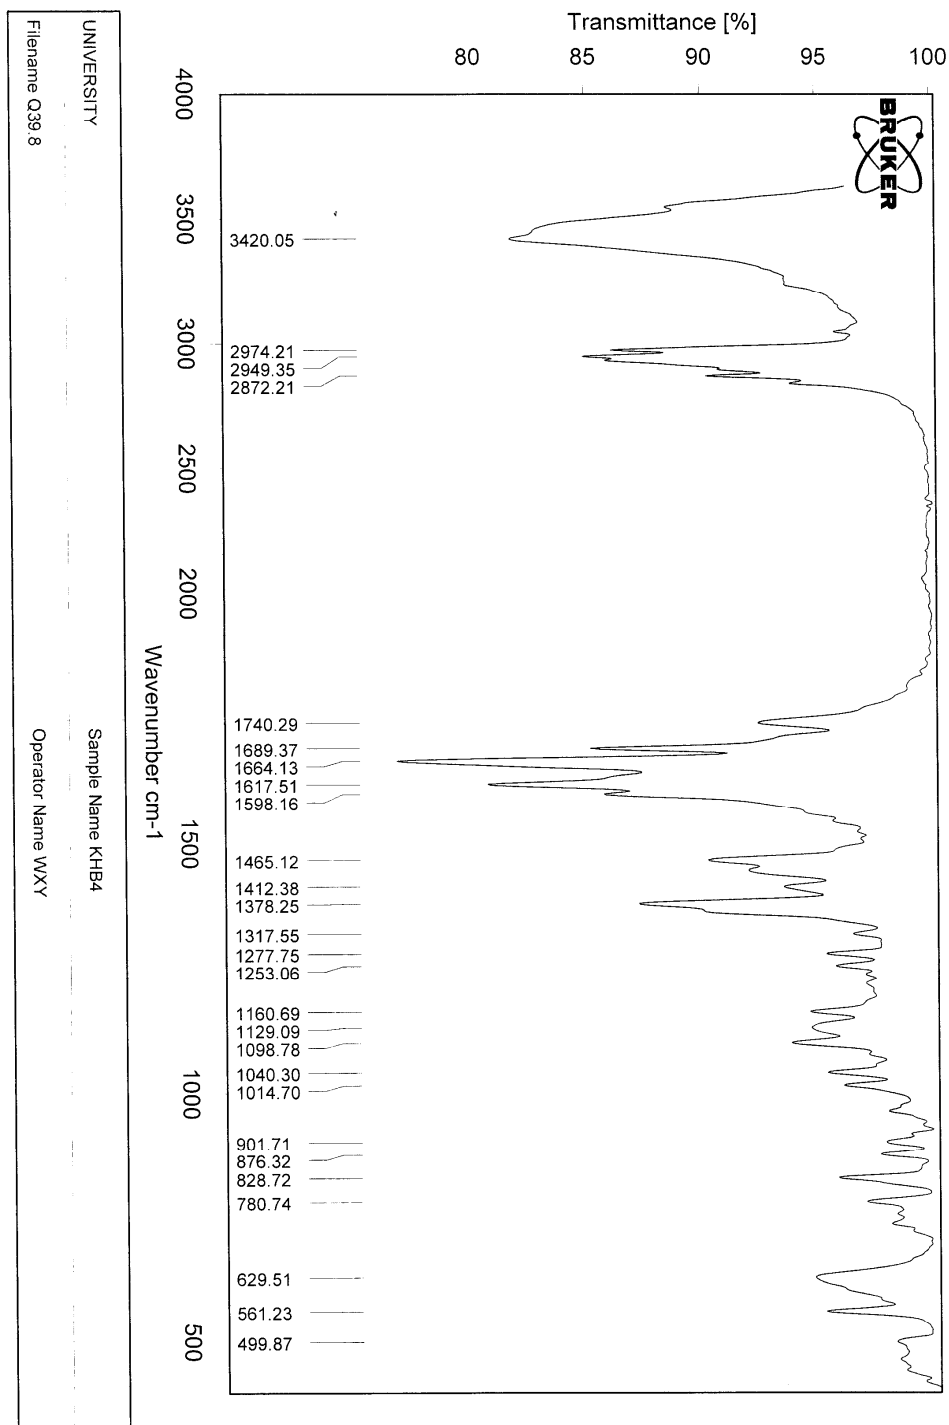

S28. ESI MS spectra of compound 4 and a mixture of compounds 2 and 3 (1:1).

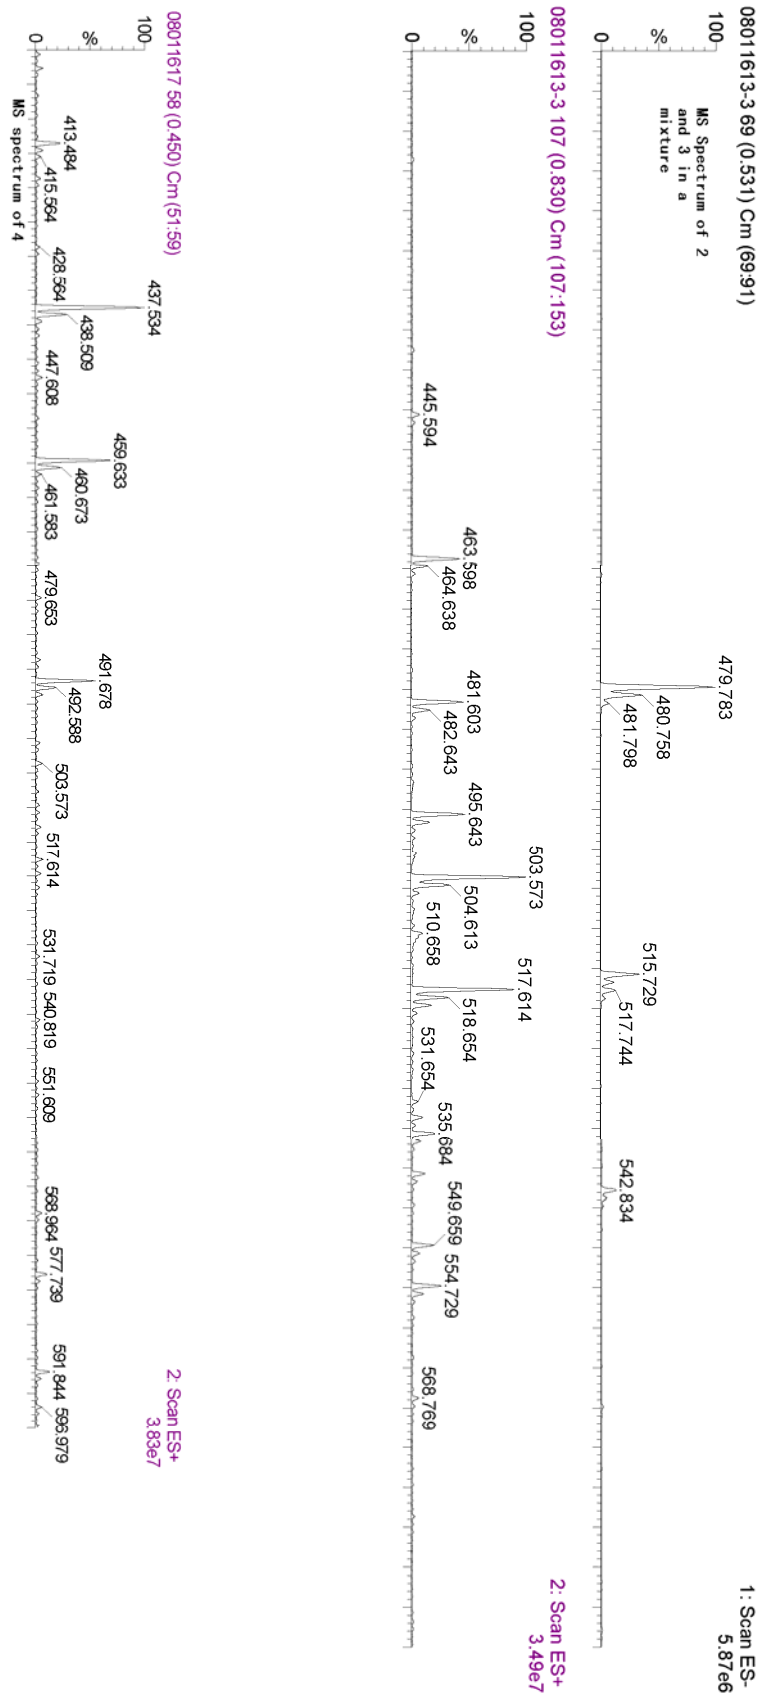

Supplement: Supplementary file 1 [file 4545196]
